# Supplementary material for: Dinuclear zwitterionic silver(i) and gold(i) complexes bearing 2,2-acetate-bridged bisimidazolylidene ligands
Source: Royal Society of Chemistry journal article supplement (doi:10.1039/c9dt03035b), 2019-01-01
Supplement: c9dt03035b1.pdf [file c9dt03035b1.pdf]

## *Supporting Information*

### **Dinuclear Zwitterionic Silver(I) and Gold(I) Complexes Bearing 2,2-Acetate-Bridged Bisimidazolylidene Ligands**

Bruno Dominelli,<sup>a</sup> Gerri M. Roberts,<sup>a</sup> Christian Jandl,<sup>a</sup> Pauline J. Fischer,<sup>a</sup> Robert M. Reich,<sup>a</sup> Alexander Pöthig,<sup>a</sup> João D.G. Correia,<sup>b</sup> Fritz E. Kühn<sup>a\*</sup>

<sup>a</sup> Molecular Catalysis, Catalysis Research Center and Department of Chemistry, Technische Universität München, Lichtenbergstr. 4, 85747 Garching bei München, Germany.

<sup>b</sup> Centro de Ciências e Tecnologias Nucleares, Departamento de Engenharia e Ciências Nucleares, Instituto Superior Técnico, Universidade de Lisboa, Campus Tecnológico e Nuclear, Estrada Nacional N° 10 (km 139,7), 2695-066 Bobadela LRS, Portugal

\* Corresponding Author: E-mail: [fritz.kuehn@ch.tum.de](mailto:fritz.kuehn@ch.tum.de);

### **Table of Contents**

|                                                   |         |
|---------------------------------------------------|---------|
| 1. General                                        | S2      |
| 2. <sup>1</sup> H and <sup>13</sup> C NMR spectra | S3-S10  |
| 3. DOSY spectra                                   | S11-S13 |
| 4. Decarboxylation studies                        | S14     |
| 5. Protonation Studies                            | S15-S16 |
| 6. Esterification and Amidation attempts          | S17     |
| 7. FTIR spectra                                   | S18-S20 |
| 8. SC-XRD Data                                    | S21     |
| 9. References                                     | S22     |

## 1. General

All chemicals and solvents were purchased from common commercial suppliers and used without further purification. **L<sub>a</sub>-H<sub>2</sub>-Br** and **L<sub>b</sub>-H<sub>2</sub>-Br** has been synthesized according to the respective literature procedure.<sup>1, 2</sup> The corresponding zwitterionic dinuclear silver(I)- and gold(I)-bis(NHC) complexes, have been obtained by treatment of the bisimidazolium salts with Ag<sub>2</sub>O and further transmetalation to a gold(I)-precursor.<sup>3, 4</sup> <sup>1</sup>H NMR and <sup>13</sup>C-NMR spectra were recorded on a *Bruker AV400US* with broad band probe and a gradient coil (<sup>1</sup>H-NMR, 400.13 MHz, <sup>13</sup>C-NMR, 100.53 MHz) and a *Bruker DRX-400* spectrometer with broad band probe (<sup>1</sup>H-NMR 400.13 MHz; <sup>13</sup>C-NMR 100.61 MHz). All <sup>13</sup>C-Cryo-NMR spectra were recorded on a *Bruker AV500C QNP Cryo probe*. Chemical shifts ( $\delta$ ) are reported relative to the residual signal of the deuterated solvent. **Elemental analyses** were carried out by the microanalytical laboratory at the Technical University of Munich. **ESI mass spectrometry** was performed at *Thermo Scientific* LCQ Fleet Spectrometer with a time-of-flight analyser for mass detection. As eluent a mixture of acetonitrile and formic acid (0.1 Vol.%) was used as positive ionization source. FT-IR spectroscopy was measured on PerkinElmer Frontier™ FT-IR spectrometer equipped with an ATR plate with combined ZnSe/Diamond-crystal and a spectral range from 4000 – 650 cm<sup>-1</sup>. Data were collected on a single crystal x-ray diffractometer equipped with a CCD detector (APEX II,  $\kappa$ -CCD), a rotating anode FR591 and a Montel mirror optic using the APEX2 software package (**L<sub>a</sub>-H<sub>2</sub>-PF<sub>6</sub>** and **Au<sub>2</sub>(L<sub>a</sub>)<sub>2</sub>**) or a single crystal x-ray diffractometer equipped with a CMOS detector (Bruker APEX III,  $\kappa$ -CMOS), an IMS microsource with MoK $\alpha$  radiation ( $\lambda = 0.71073 \text{ \AA}$ ) and a Helios optic using the APEX3 software package (**Ag<sub>2</sub>(L<sub>a</sub>)<sub>2</sub>** and **Ag<sub>2</sub>(L<sub>b</sub>)<sub>2</sub>**).<sup>5</sup> Measurements was performed on single crystals coated with perfluorinated ether. The crystals were fixed on top of a glass fibre or kapton micro sampler and frozen under a stream of cold nitrogen. A matrix scan was used to determine the initial lattice parameters. Reflections were corrected for Lorentz and polarisation effects, scan speed, and background using SAINT.<sup>6</sup> Absorption correction, including odd and even ordered spherical harmonics was performed using SADABS or TWINABS.<sup>7</sup> Space group assignment was based upon systematic absences, E statistics, and successful refinement of the structure. The structures were solved using SHELXS or SHELXT with the aid of successive difference Fourier maps, and were refined against all data using SHELXL in conjunction with SHELXLE.<sup>8,9,10</sup> Hydrogen atoms were calculated in ideal positions as follows: Methyl hydrogen atoms were refined as part of rigid rotating groups, with a C–H distance of 0.98 Å and  $U_{\text{iso(H)}} = 1.5 \cdot U_{\text{eq(C)}}$ . Other H atoms were placed in calculated positions and refined using a riding model, with methylene and aromatic C–H distances of 0.99 Å and 0.95 Å, respectively, and other C–H distances of 1.00 Å, all with  $U_{\text{iso(H)}} = 1.2 \cdot U_{\text{eq(C)}}$ . Non-hydrogen atoms were refined with anisotropic displacement parameters. Full-matrix least-squares refinements were carried out by minimizing  $\sum w(F_o^2 - F_c^2)^2$  with the SHELXL weighting scheme.<sup>8</sup> Neutral atom scattering factors for all atoms and anomalous dispersion corrections for the non-hydrogen atoms were taken from *International Tables for Crystallography*.<sup>11</sup> A split layer refinement was used for disordered groups and additional SIMU, DELU, RIGU, ISOR and SAME restraints were used, if necessary. The unit cell of **Ag<sub>2</sub>(L<sub>a</sub>)<sub>2</sub>** contains 16 disordered water molecules and the unit cell of **Ag<sub>2</sub>(L<sub>b</sub>)<sub>2</sub>** contains 4 ethanol molecules, 3 of which were

disordered over special positions. In both cases the disordered solvent molecules were treated as a diffuse contribution to the overall scattering without specific atom positions using the PLATON/SQUEEZE procedure.<sup>12</sup> Images of the crystal structures were generated with PLATON and Mercury.<sup>13, 14</sup> CCDC 1942899-1942902 contains the supplementary crystallographic data for this paper. These data are provided free of charge by The Cambridge Crystallographic Data Centre.

## 2. $^1\text{H}$ and $^{13}\text{C}$ NMR spectra

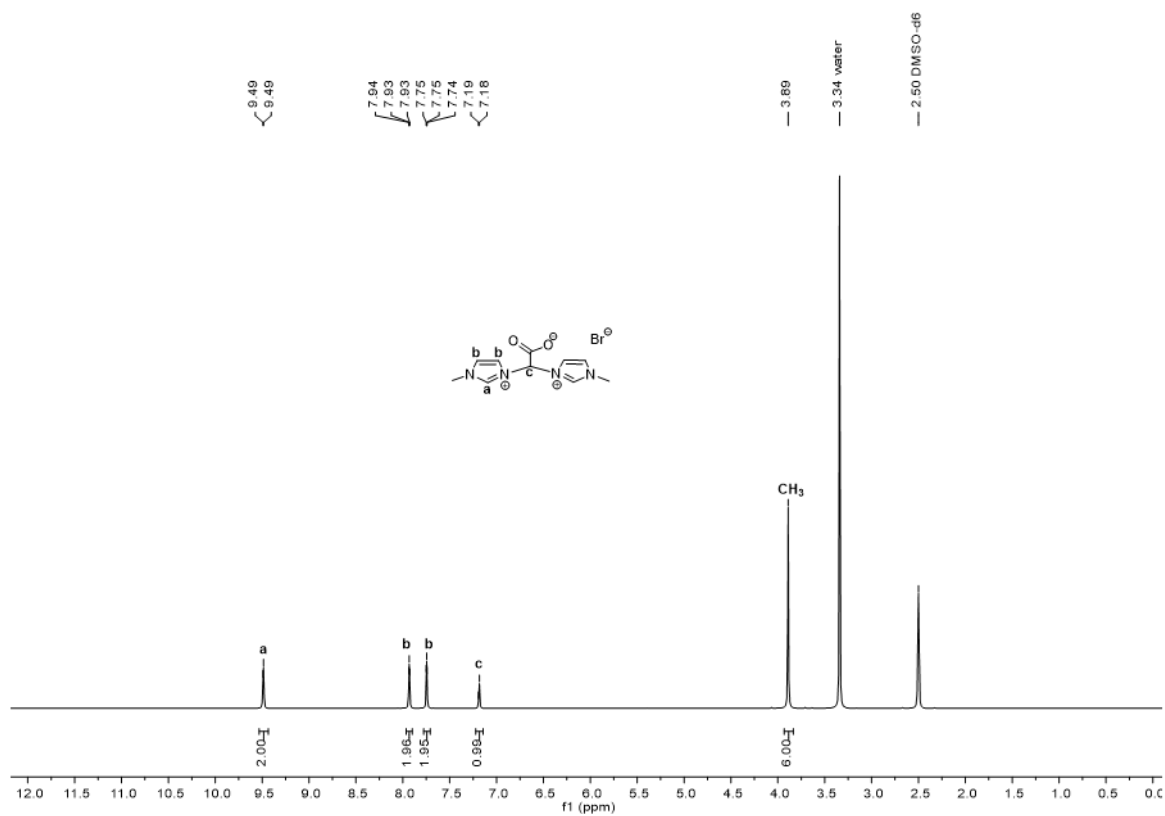

SI-Figure 1:  $^1\text{H}$  NMR spectrum of  $\text{L}_a\text{-H}_2\text{-Br}$  in  $\text{DMSO-d}_6$  at room temperature.

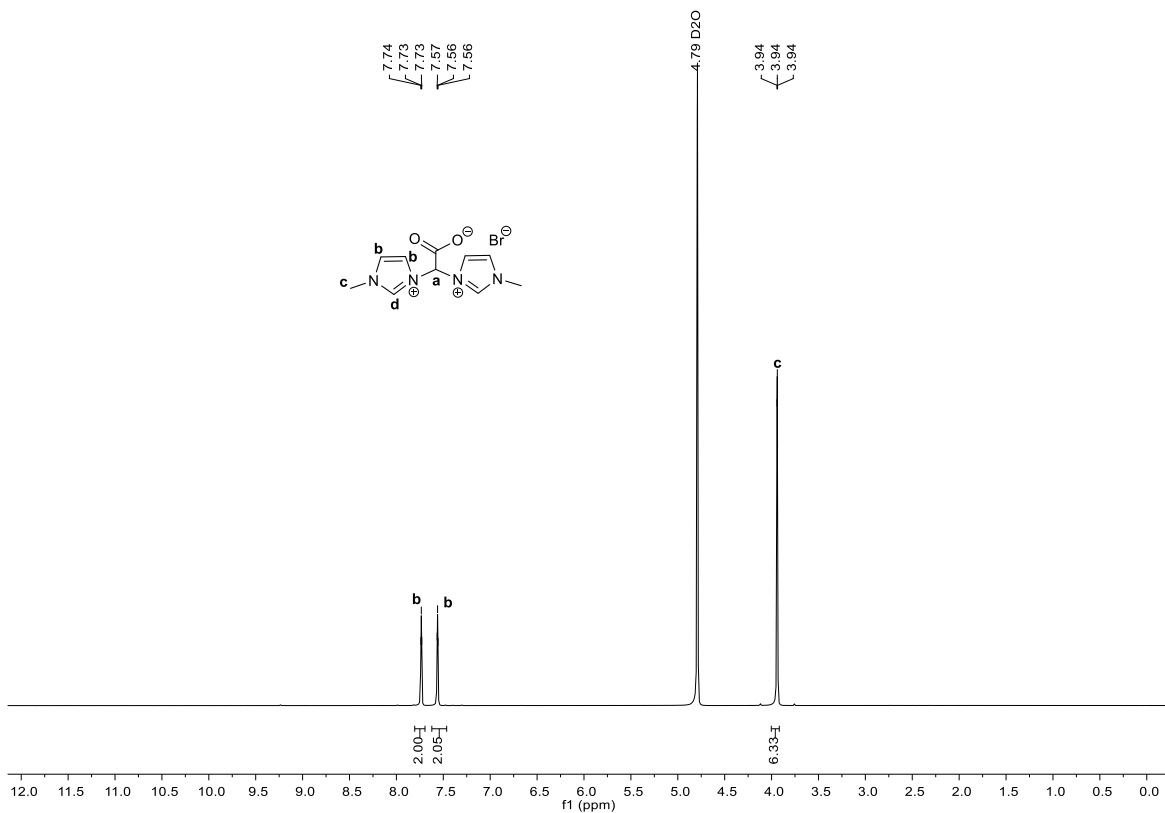

SI-Figure 2:  $^1\text{H}$  NMR spectrum of  $\text{L}_a\text{-H}_2\text{-Br}$  in  $\text{D}_2\text{O}$  at room temperature.

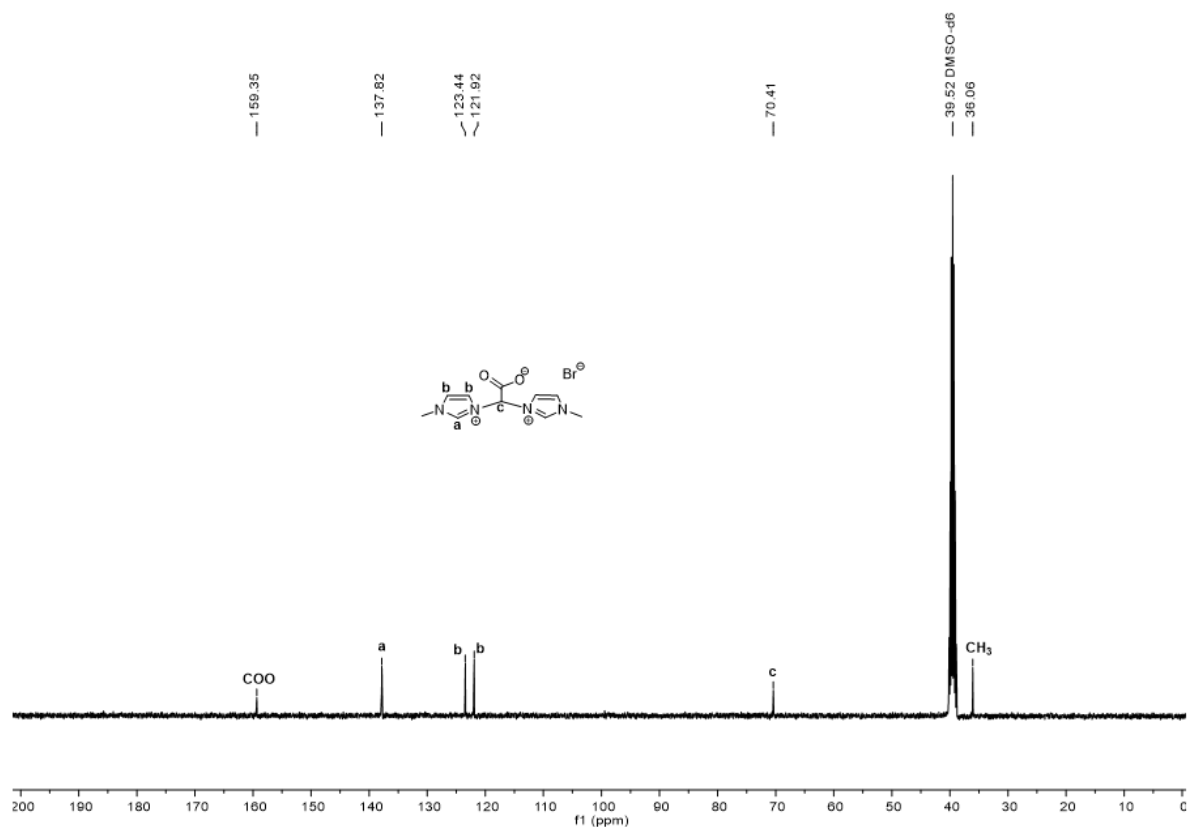

SI-Figure 3: <sup>13</sup>C NMR spectrum of **L<sub>a</sub>-H<sub>2</sub>-Br** in DMSO-d<sub>6</sub> at room temperature.

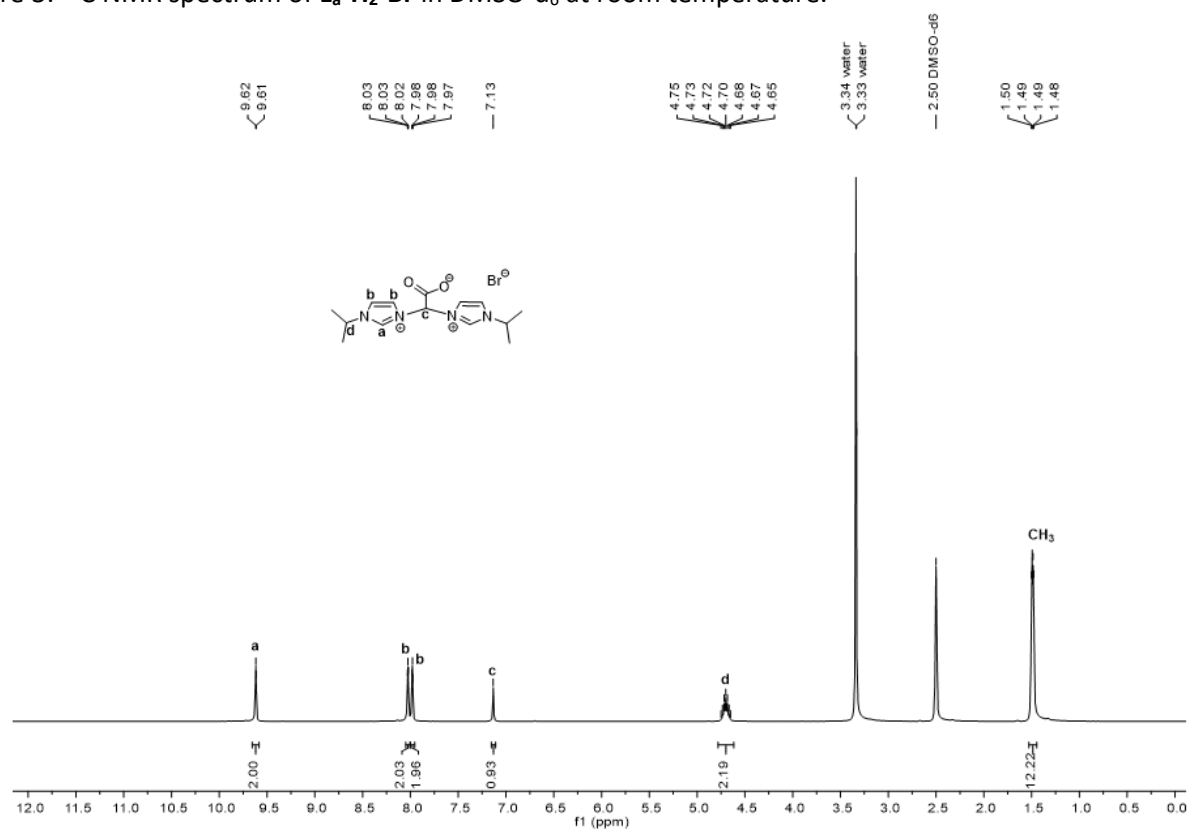

SI-Figure 4: <sup>1</sup>H NMR spectrum of **L<sub>b</sub>-H<sub>2</sub>-Br** in DMSO-d<sub>6</sub> at room temperature.

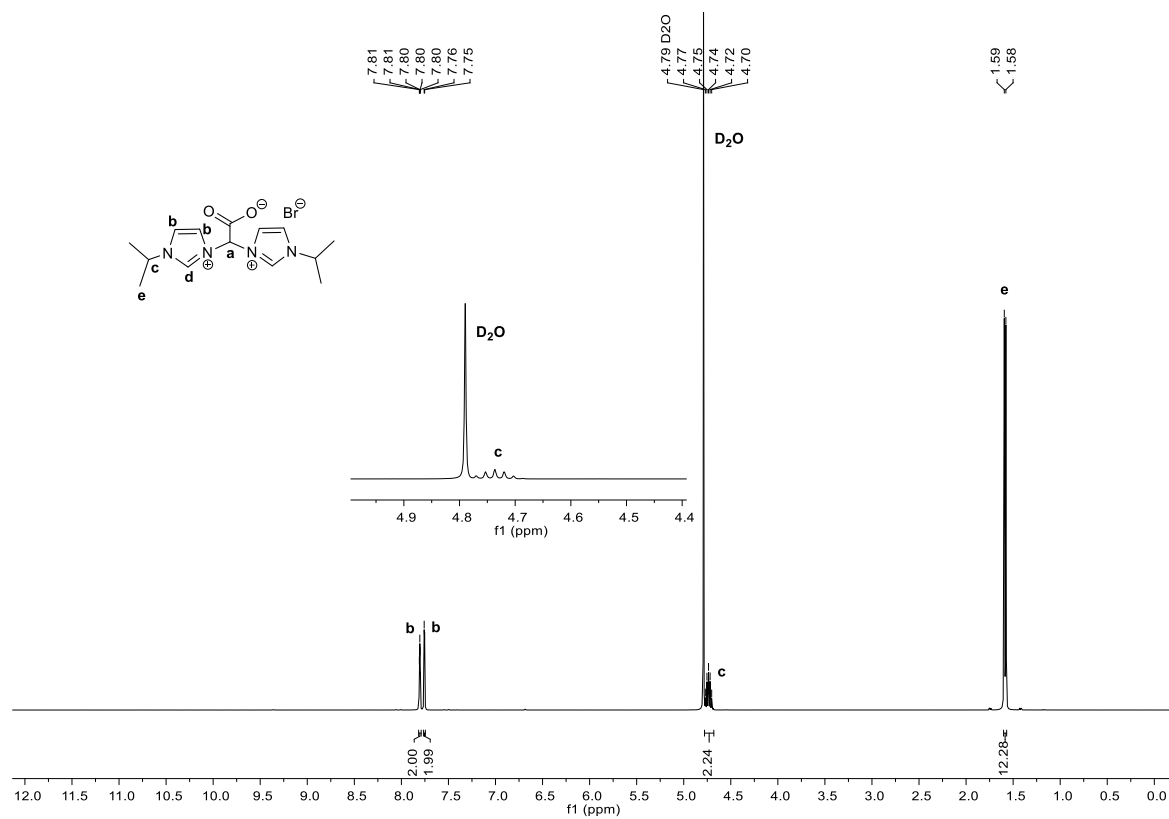

SI-Figure 5: <sup>1</sup>H NMR spectrum of **L<sub>b</sub>-H<sub>2</sub>-Br** in DMSO-d<sub>6</sub> at room temperature.

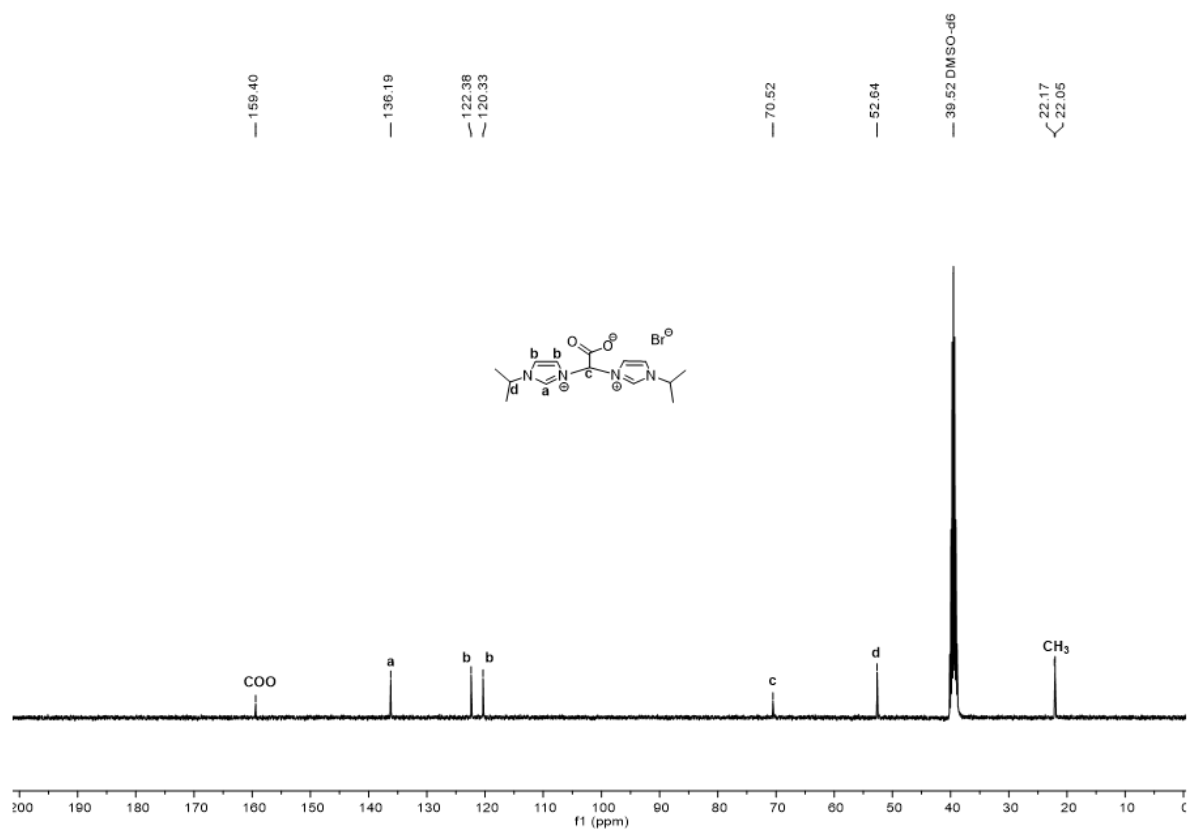

SI-Figure 6: <sup>13</sup>C NMR spectrum of **L<sub>b</sub>-H<sub>2</sub>-Br** in DMSO-d<sub>6</sub> at room temperature.

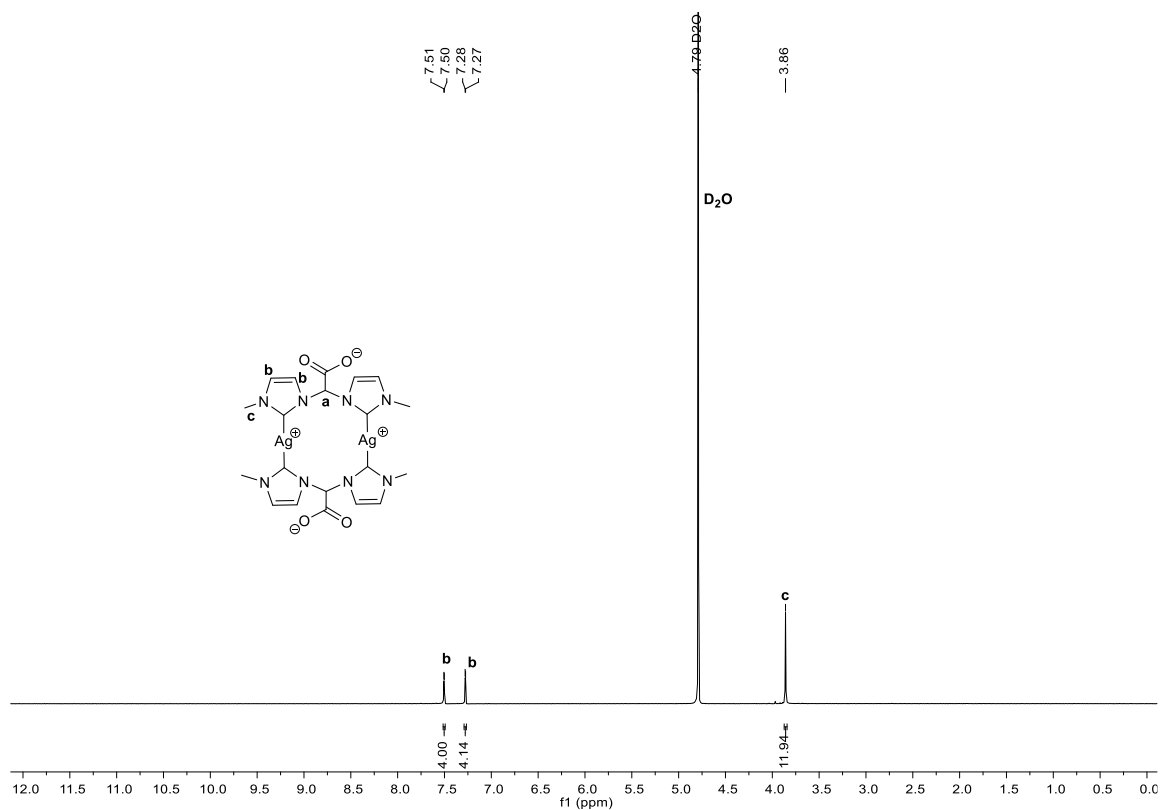

SI-Figure 7:  $^1\text{H}$  NMR spectrum of  $\text{Ag}_2(\text{L}_a)_2$  in  $\text{D}_2\text{O}$  at room temperature.

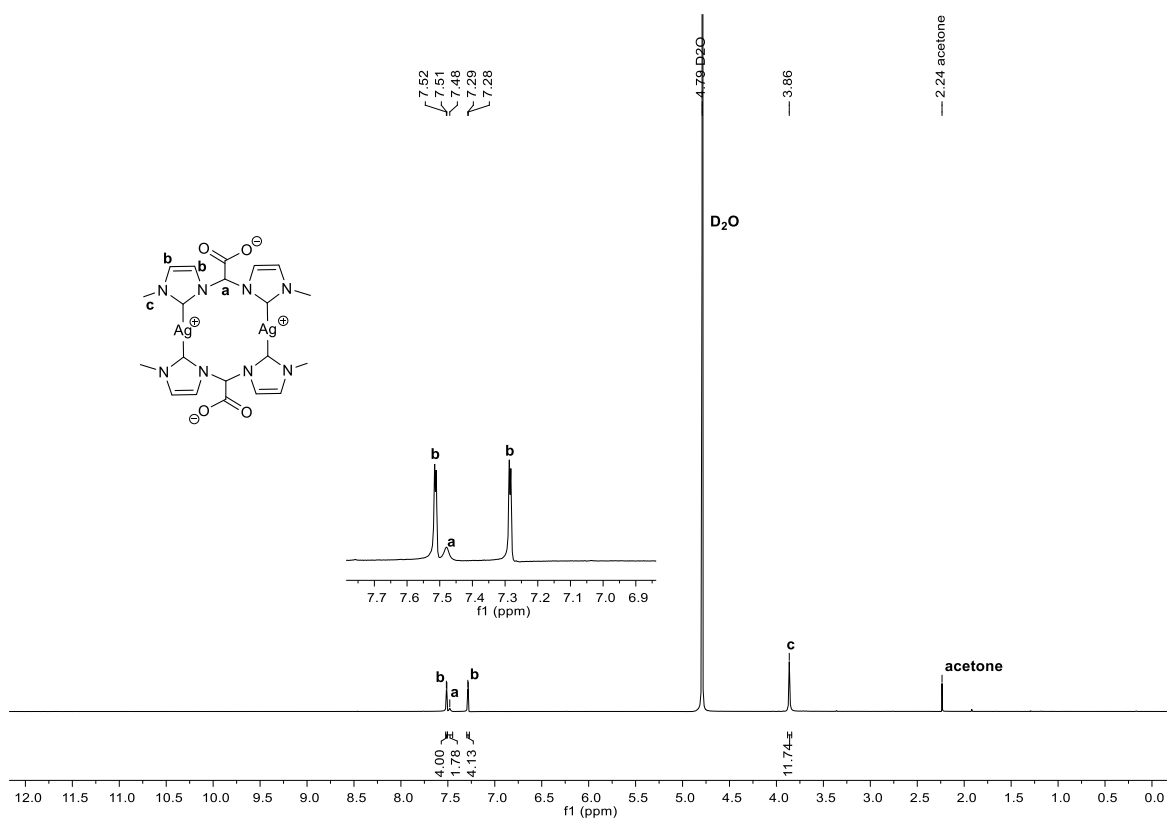

SI-Figure 8:  $^1\text{H}$  NMR spectrum of  $\text{Ag}_2(\text{L}_a)_2$  in  $\text{D}_2\text{O}$  at room temperature. Acetone is present, but the methylene bridge proton is visible.

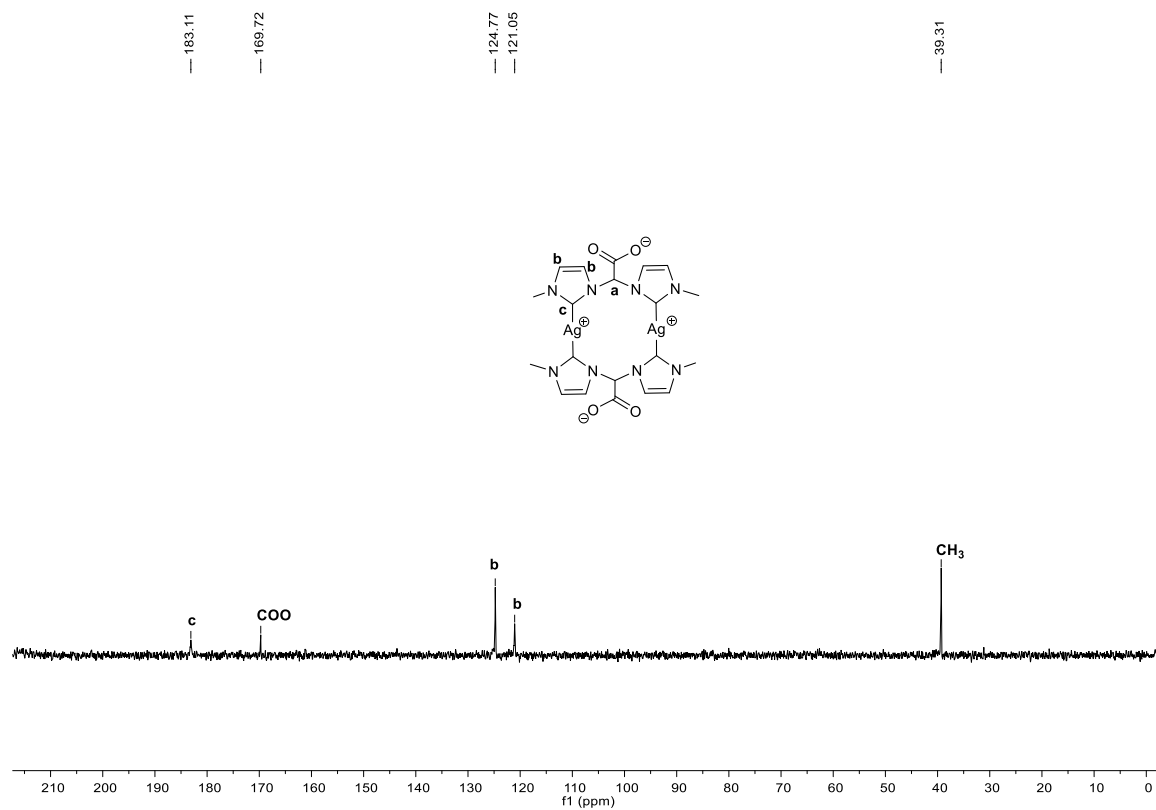

SI-Figure 9:  $^{13}\text{C}$  NMR spectrum of  $\text{Ag}_2(\text{L}_a)_2$  in  $\text{D}_2\text{O}$  at room temperature.

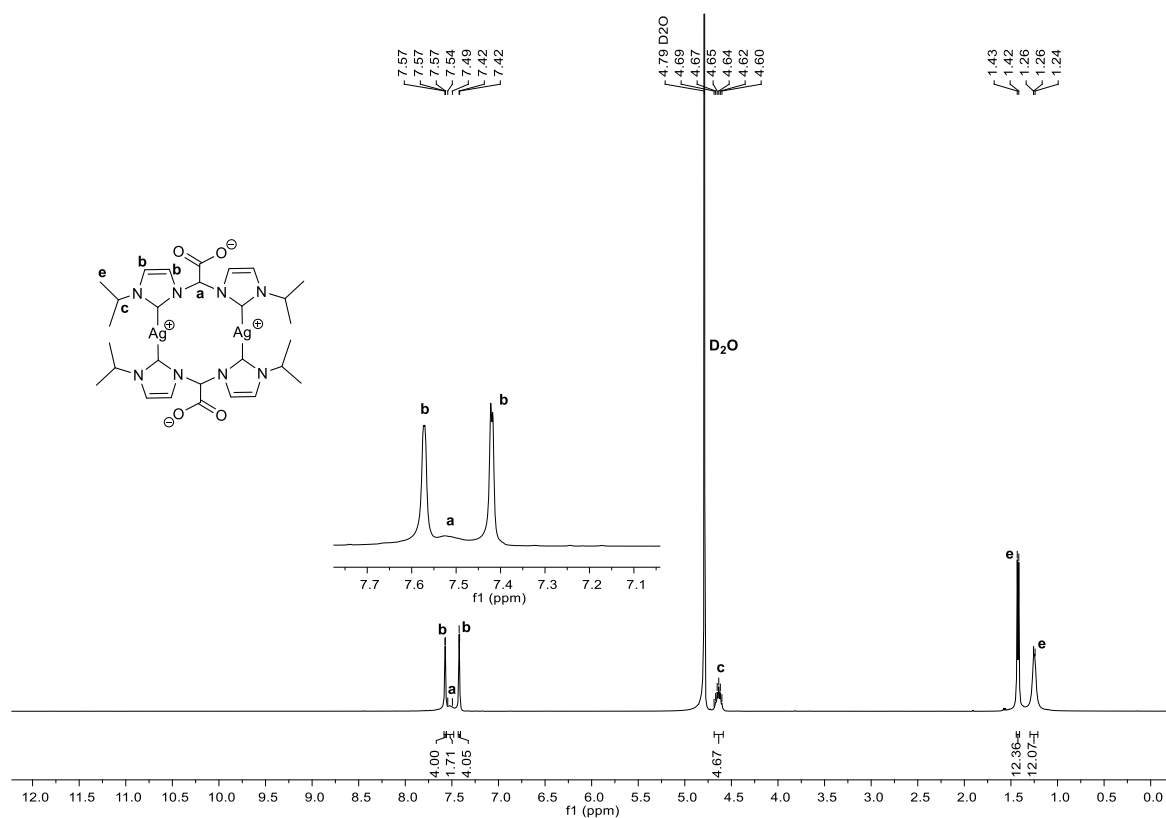

SI-Figure 10:  $^1\text{H}$  NMR spectrum of  $\text{Ag}_2(\text{L}_b)_2$  in  $\text{D}_2\text{O}$  at room temperature.



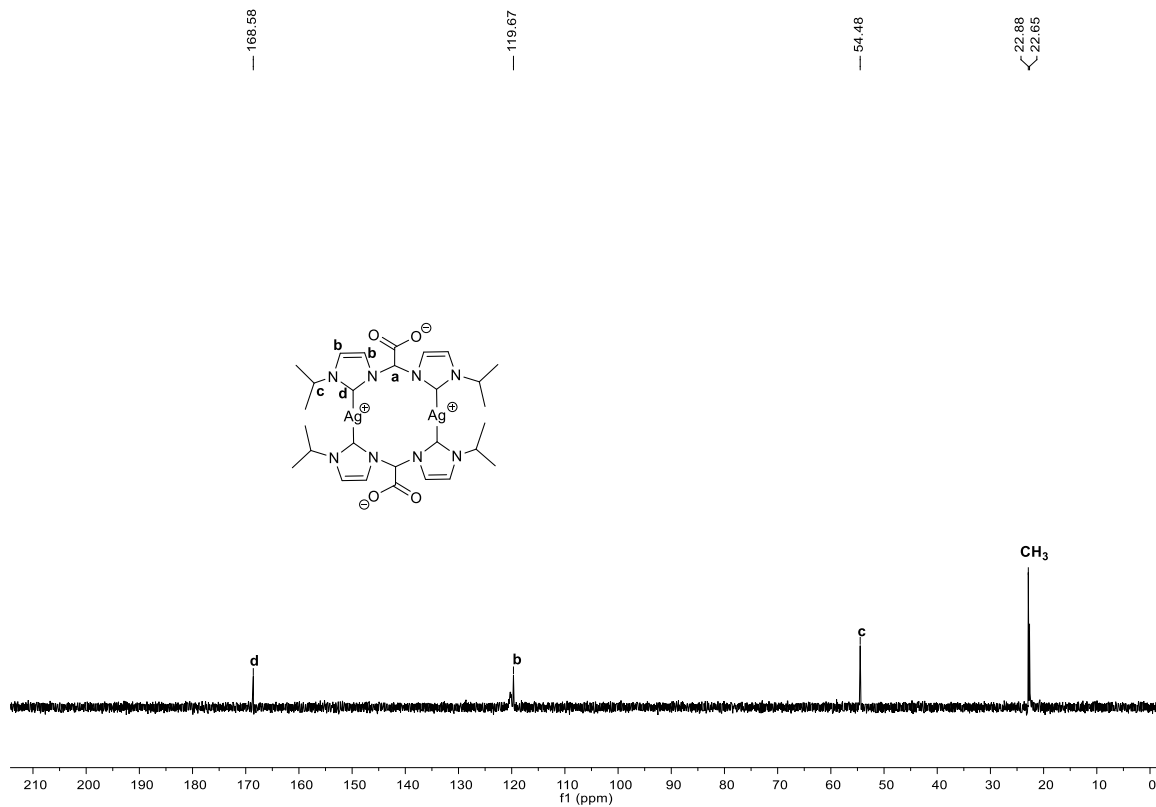

SI-Figure 11:  $^{13}\text{C}$  NMR spectrum of  $\text{Ag}_2(\text{L}_b)_2$  in  $\text{D}_2\text{O}$  at room temperature.

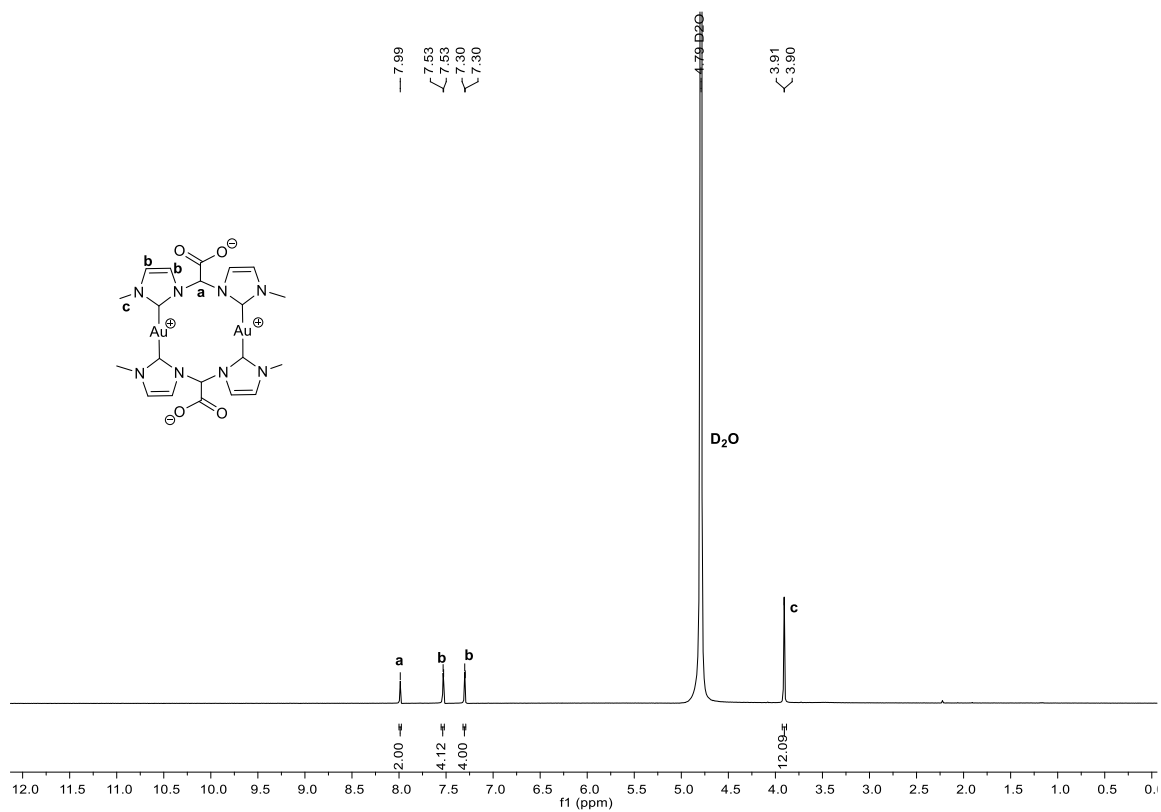

SI-Figure 12:  $^1\text{H}$  NMR spectrum  $\text{Au}_2(\text{L}_a)_2$  in  $\text{D}_2\text{O}$  at room temperature.

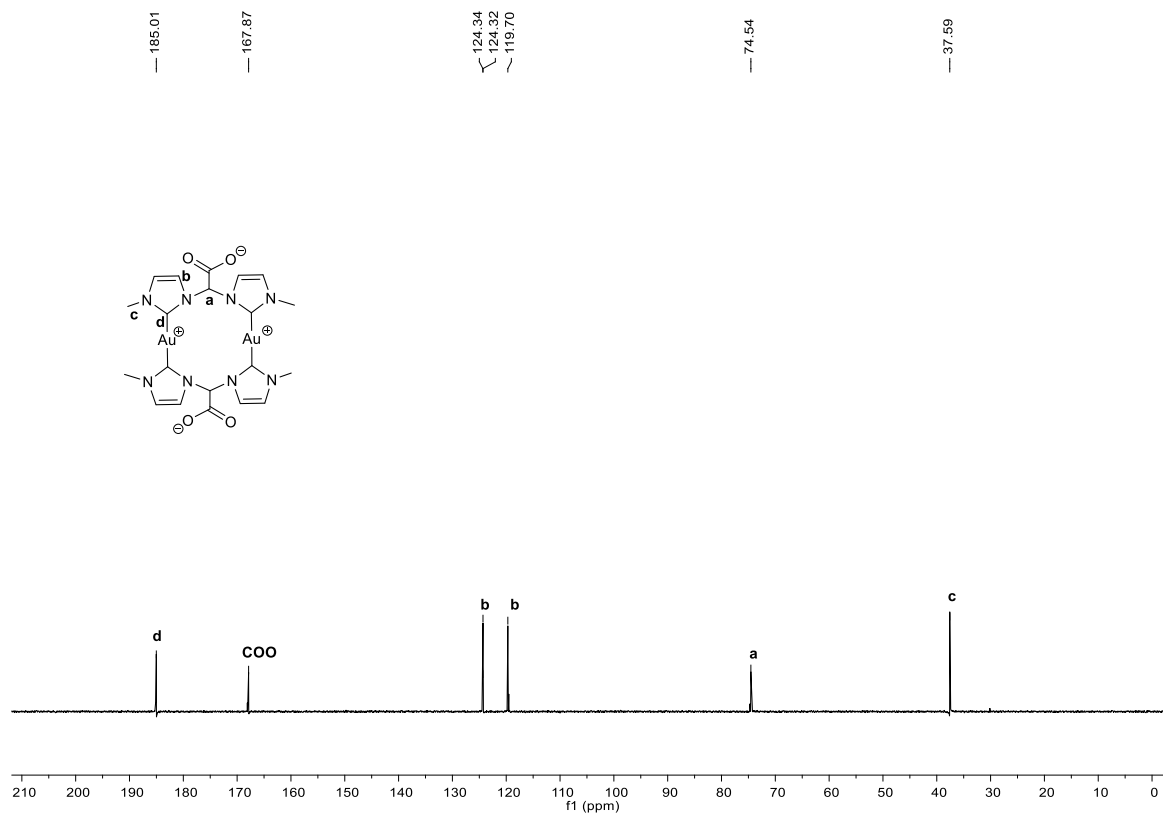

SI-Figure 13:  $^{13}\text{C}$  Cryo NMR spectrum of  $\text{Au}_2(\text{L}_a)_2$  in  $\text{D}_2\text{O}$  at room temperature.

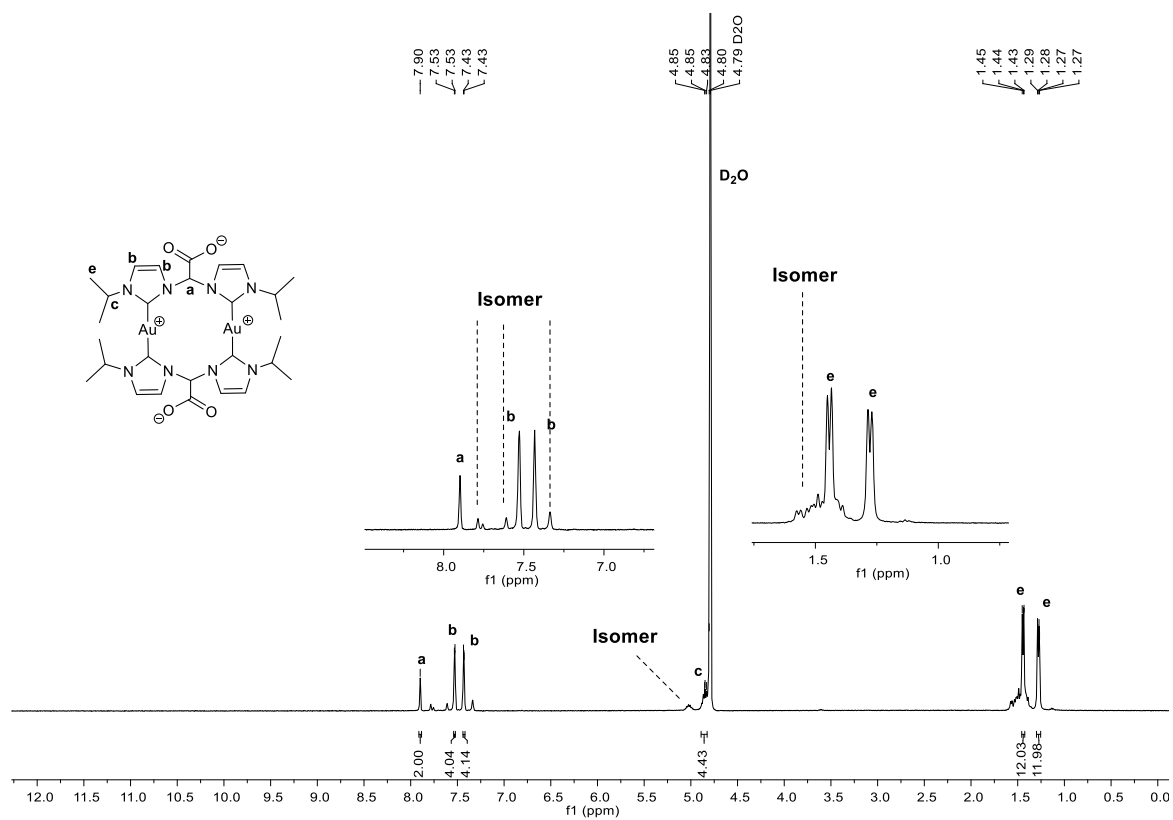

SI-Figure 14:  $^1\text{H}$  NMR spectrum of isomer mixture of  $\text{Au}_2(\text{L}_b)_2$  in  $\text{D}_2\text{O}$  at room temperature.

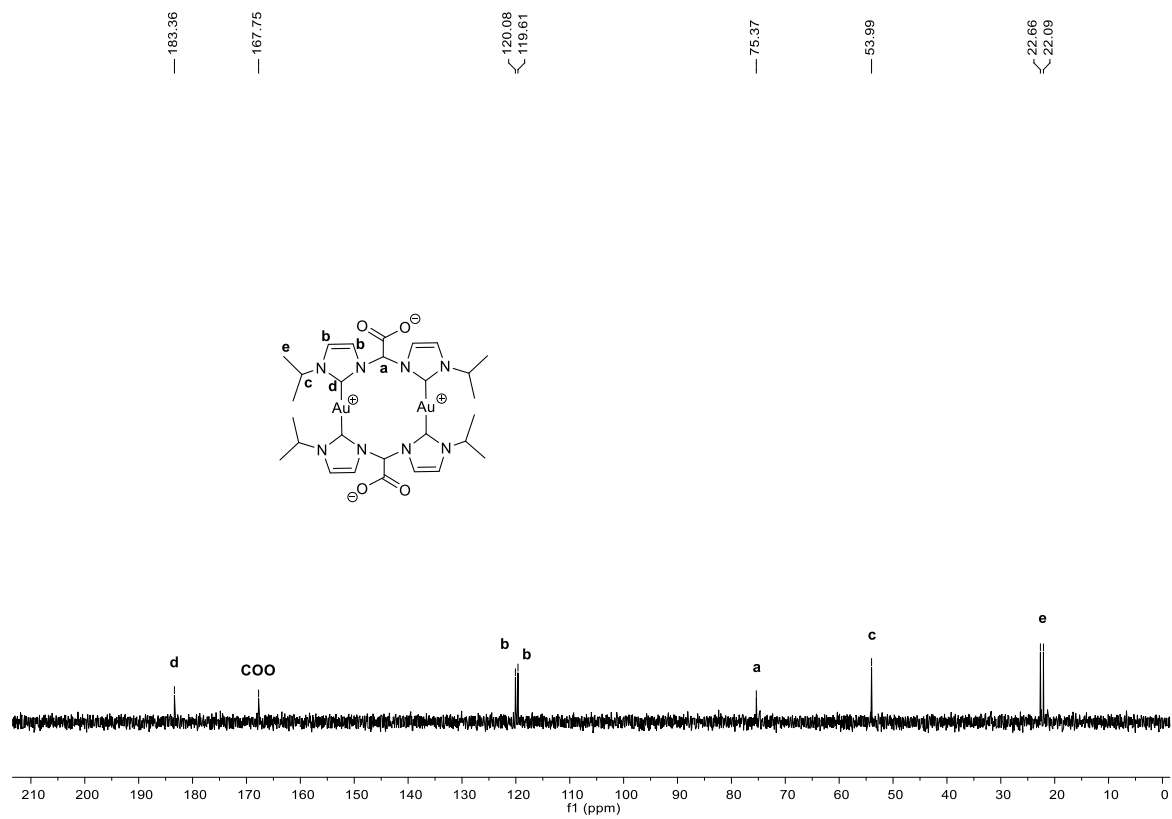

SI-Figure 15:  $^{13}\text{C}$  NMR spectrum of isomer mixture of  $\text{Au}_2(\text{L}_b)_2$  in  $\text{D}_2\text{O}$  at room temperature.

### 3. DOSY Spectra

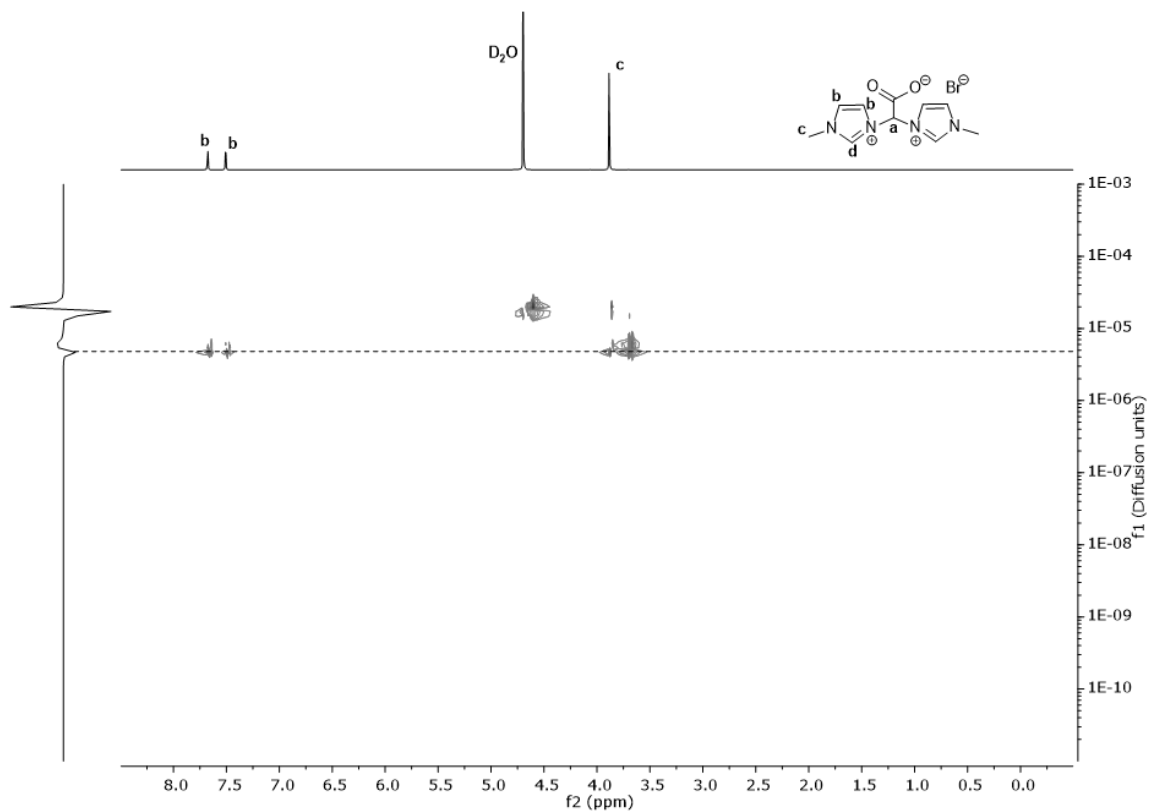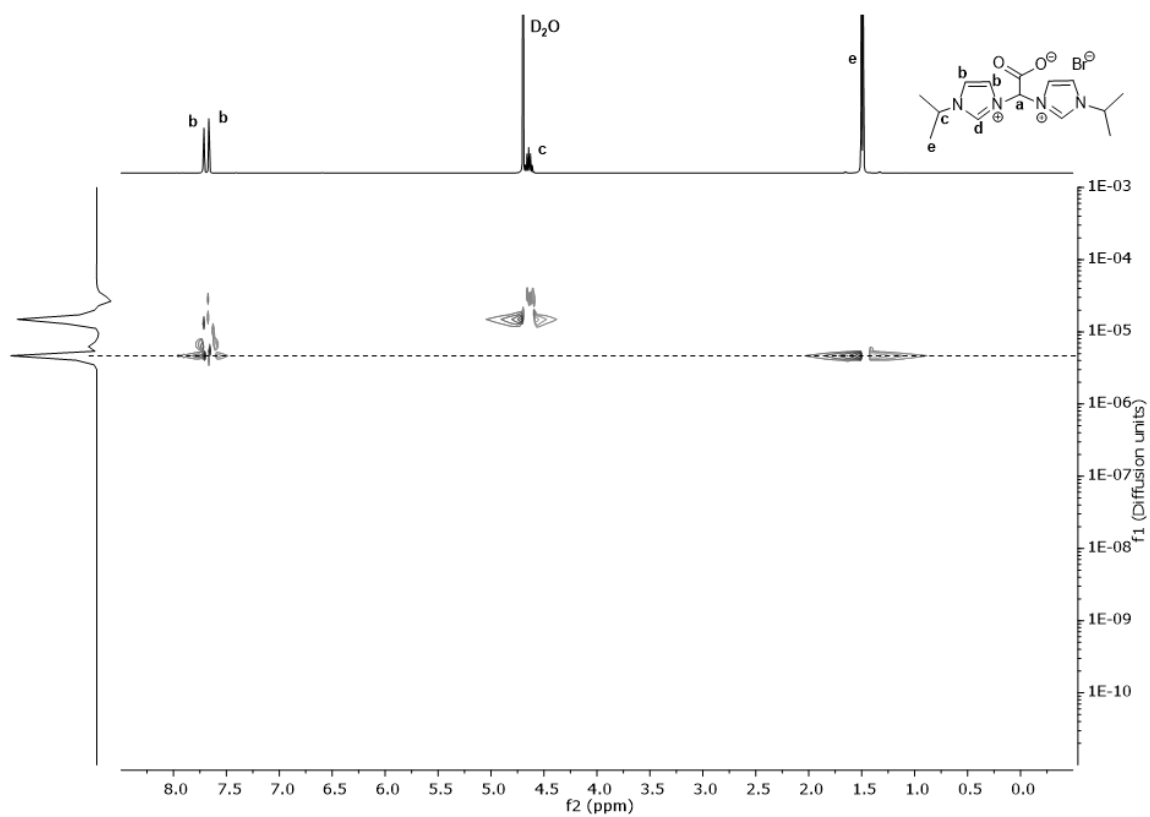

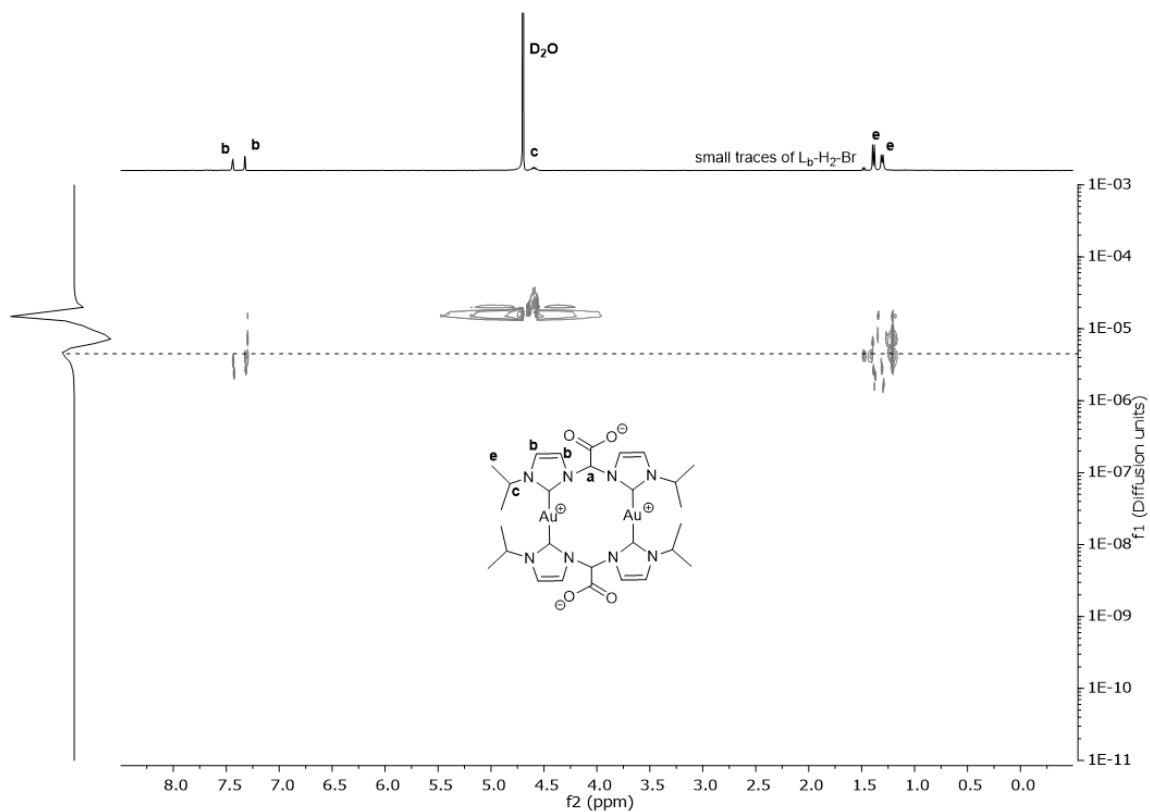

SI-Figure 18: DOSY spectrum of  $\text{Ag}_2(\text{L}_a)_2$  in  $\text{D}_2\text{O}$  at room temperature. Diffusion coefficient amounts to  $4.13 \cdot 10^{-06} \text{ cm}^2/\text{s}$ .

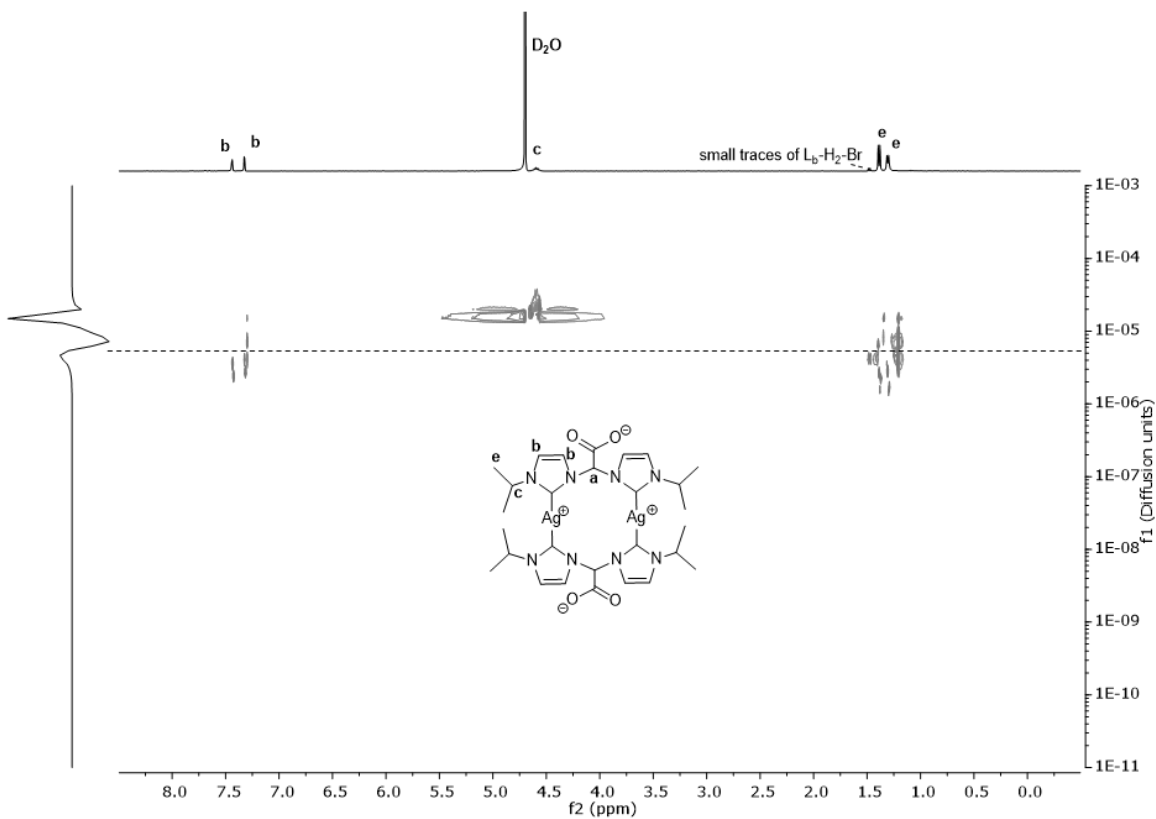

SI-Figure 19: DOSY spectrum of  $\text{Ag}_2(\text{L}_b)_2$  in  $\text{D}_2\text{O}$  at room temperature. Diffusion coefficient amounts to  $4.40 \cdot 10^{-06} \text{ cm}^2/\text{s}$ .

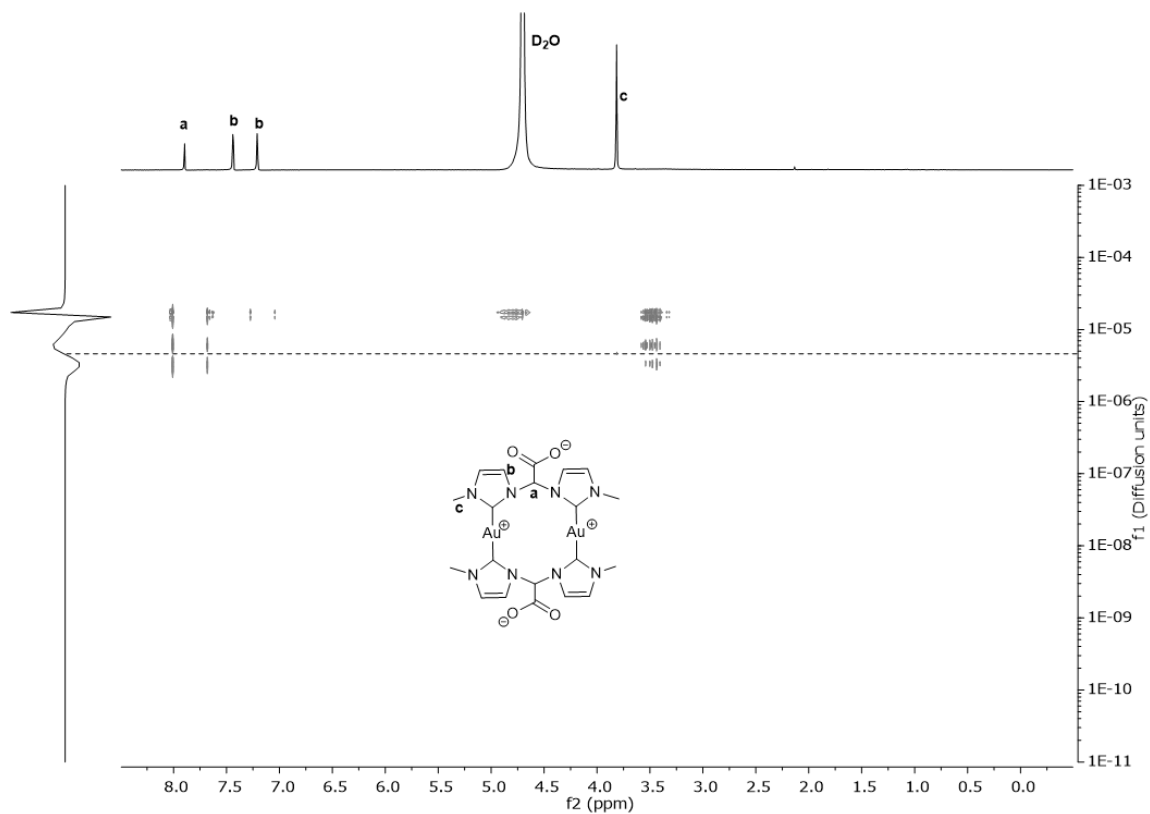

SI-Figure 20: DOSY spectrum of isomer mixture of  $\text{Au}_2(\text{L}_a)_2$  in  $\text{D}_2\text{O}$  at room temperature. Diffusion coefficient amounts to  $4.26 \cdot 10^{-06} \text{ cm}^2/\text{s}$ .

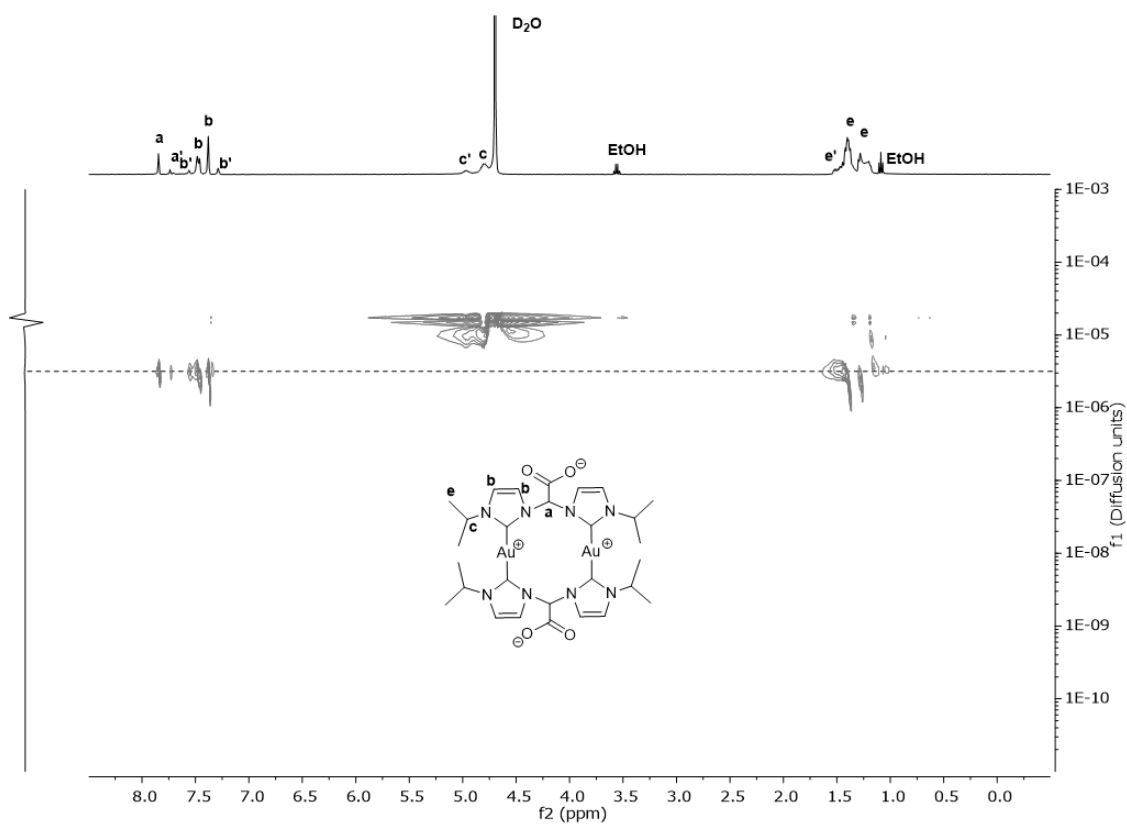

SI-Figure 21: DOSY spectrum of isomer mixture of  $\text{Au}_2(\text{L}_b)_2$  in  $\text{D}_2\text{O}$  at room temperature. Diffusion coefficient amounts to  $4.00 \cdot 10^{-06} \text{ cm}^2/\text{s}$ .

#### 4. VT NMR spectra for decarboxylation studies

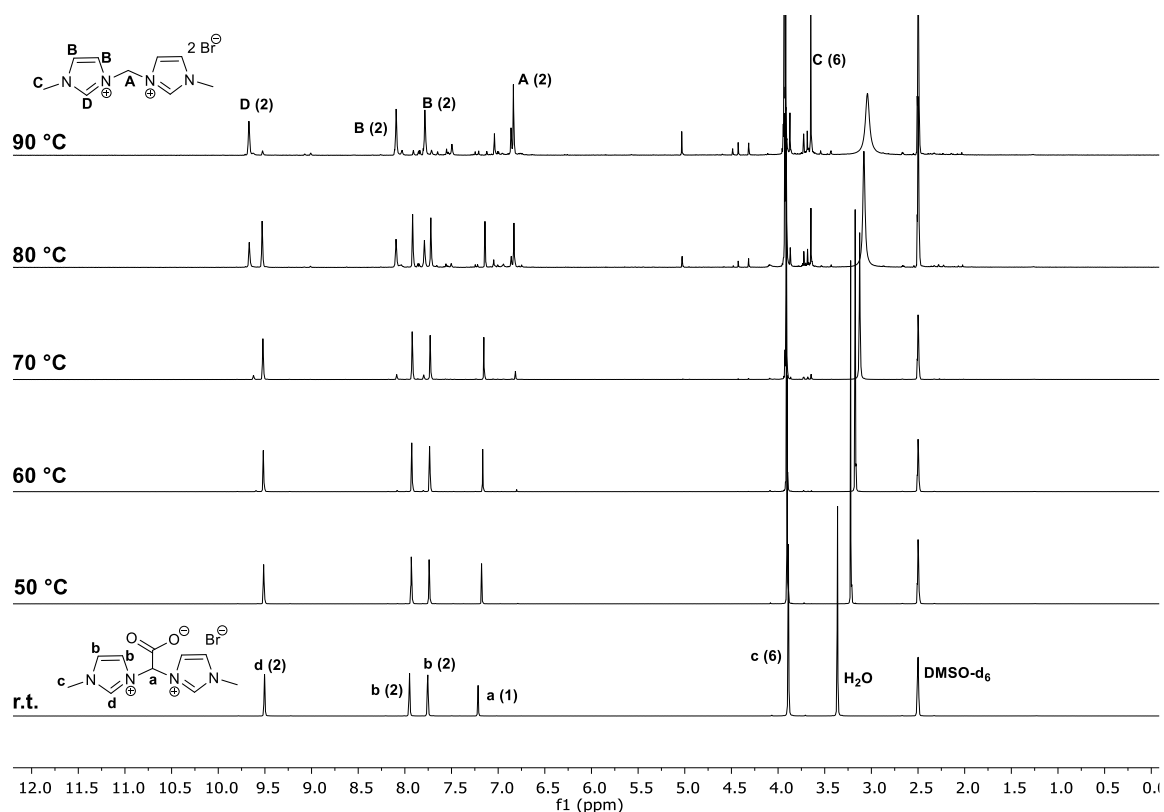

SI-Figure 22: VT( $^1H$ )-NMR of  $L_a-H_2-Br$  in DMSO- $d_6$  between room temperature (r.t.) and 90 °C. The chemical shifts are assigned with letters and the corresponding integral in brackets.

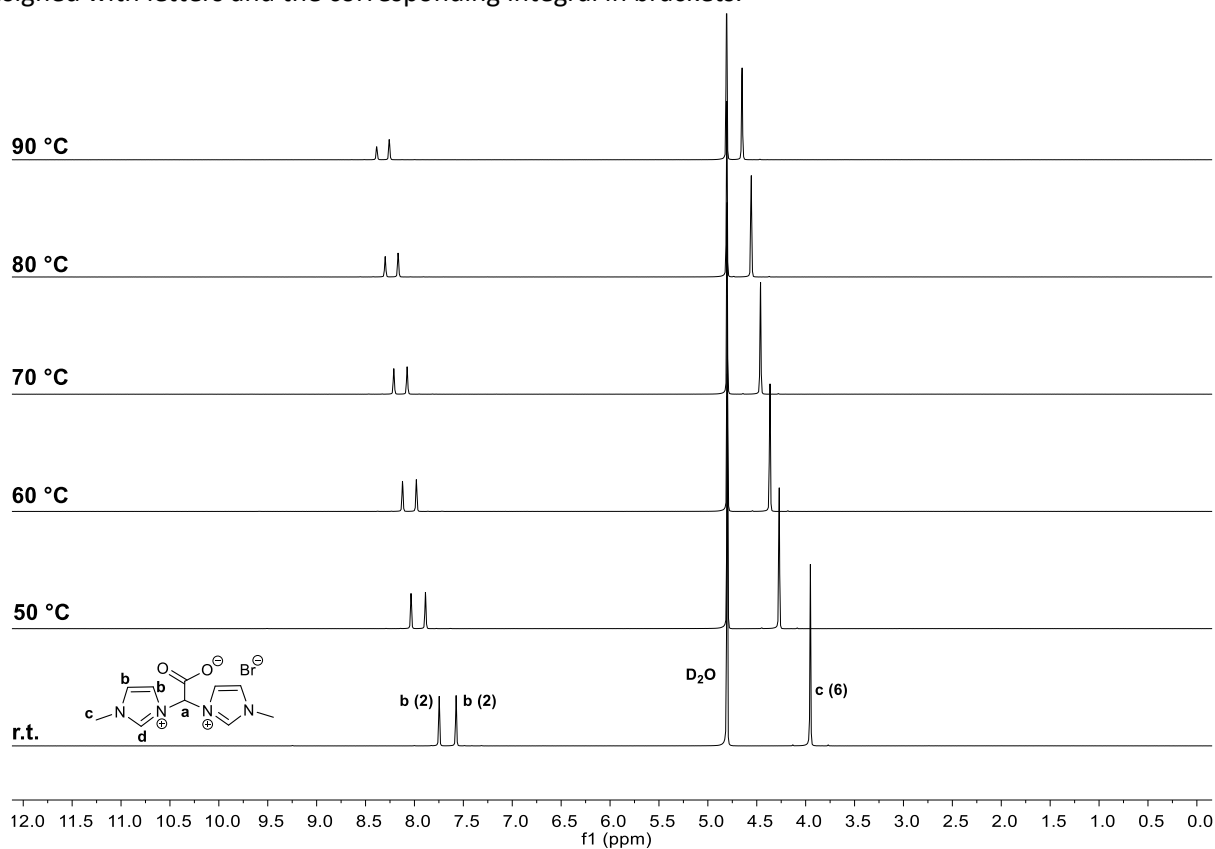

SI-Figure 23: VT( $^1H$ )-NMR of  $L_a-H_2-Br$  in  $D_2O$  between room temperature (r.t.) and 90 °C. The chemical shifts are assigned with letters and the corresponding integral in brackets.

## 5. Protonation Studies

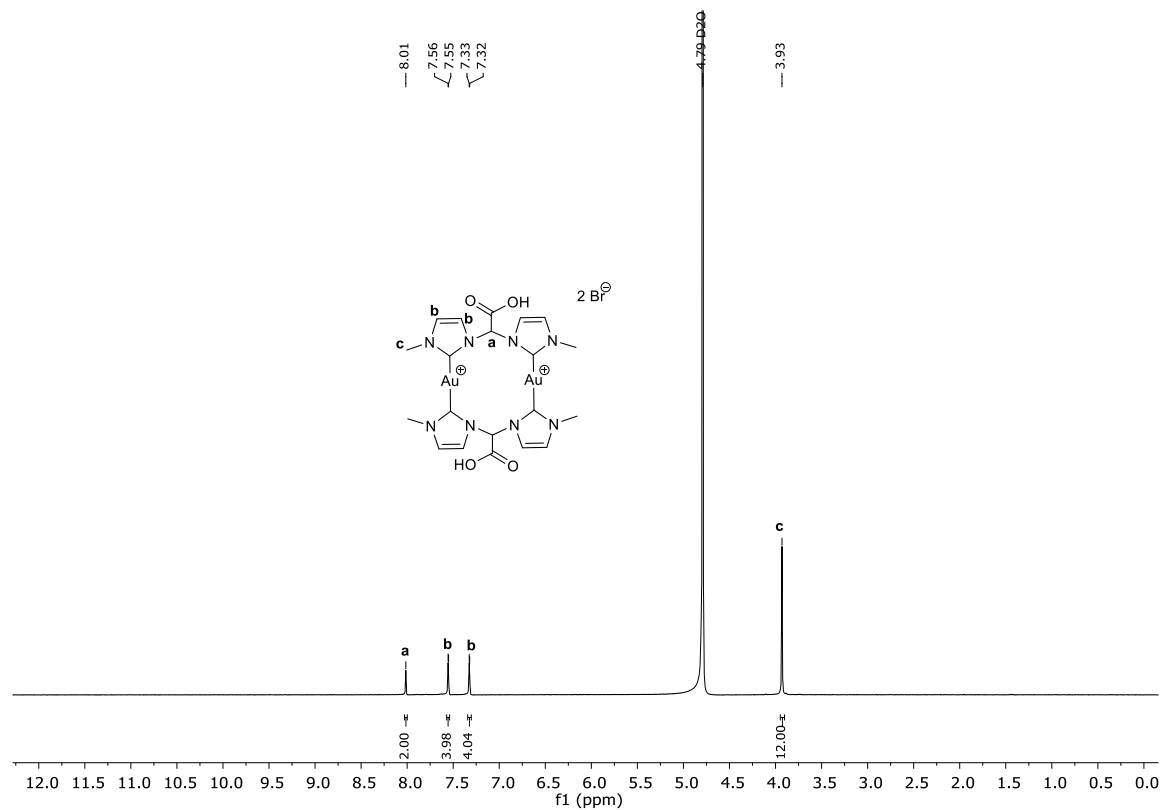

SI-Figure 24: <sup>1</sup>H NMR spectrum of  $\text{Au}_2(\text{L}_a)_2(\text{HBr})_2$  in  $\text{D}_2\text{O}$  at room temperature.

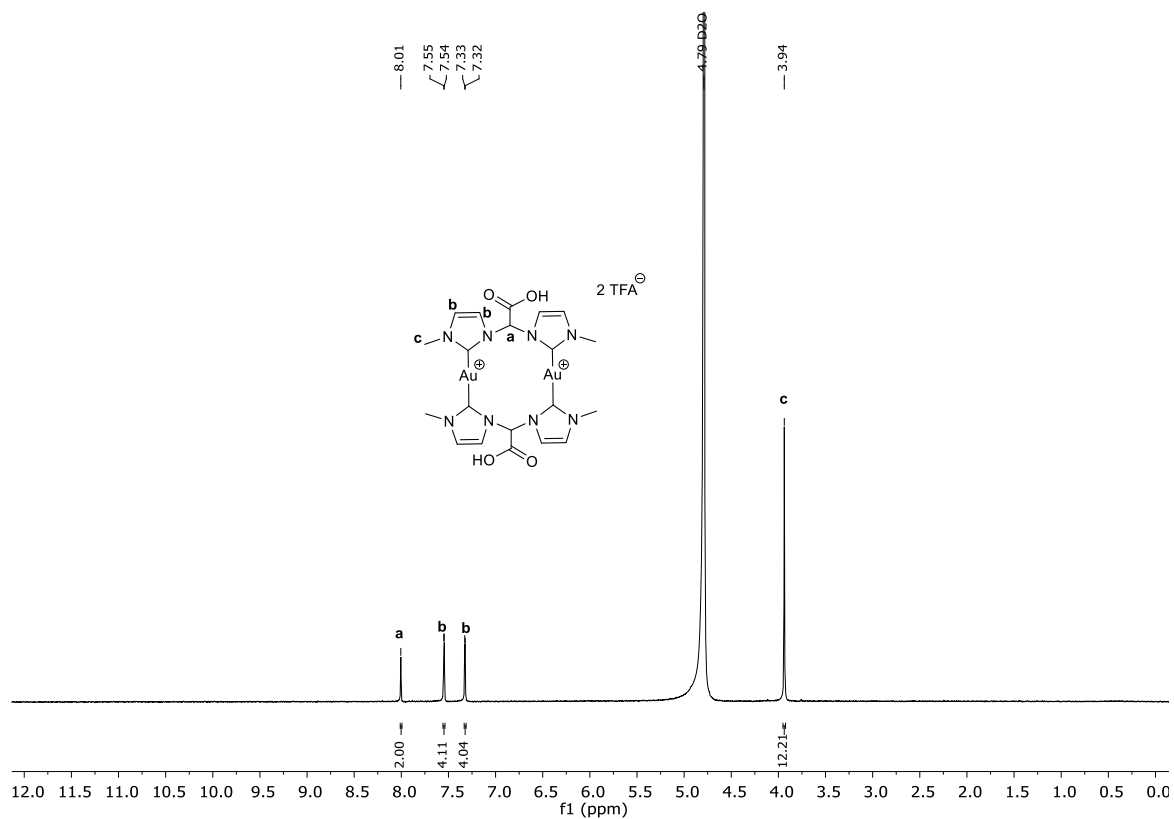

SI-Figure 25: <sup>1</sup>H NMR spectrum of  $\text{Au}_2(\text{L}_a)_2(\text{HTFA})_2$  in  $\text{D}_2\text{O}$  at room temperature.



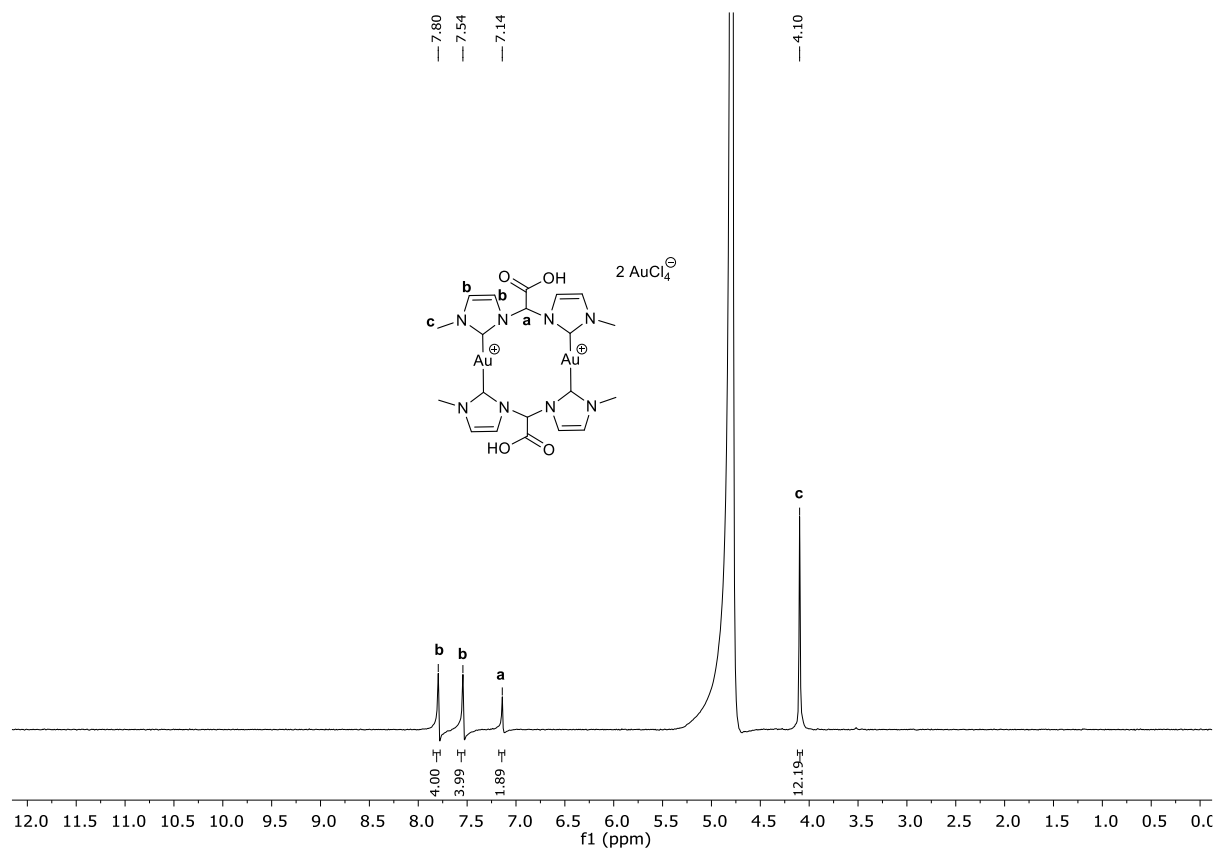

SI-Figure 26:  $^1\text{H}$  NMR spectrum of  $\text{Au}_2(\text{L}_a)_2(\text{HAuCl}_4)_2$  in  $\text{D}_2\text{O}$  at room temperature.

## 6. Esterification and Amidation attempts

### Bisimidazolium salt

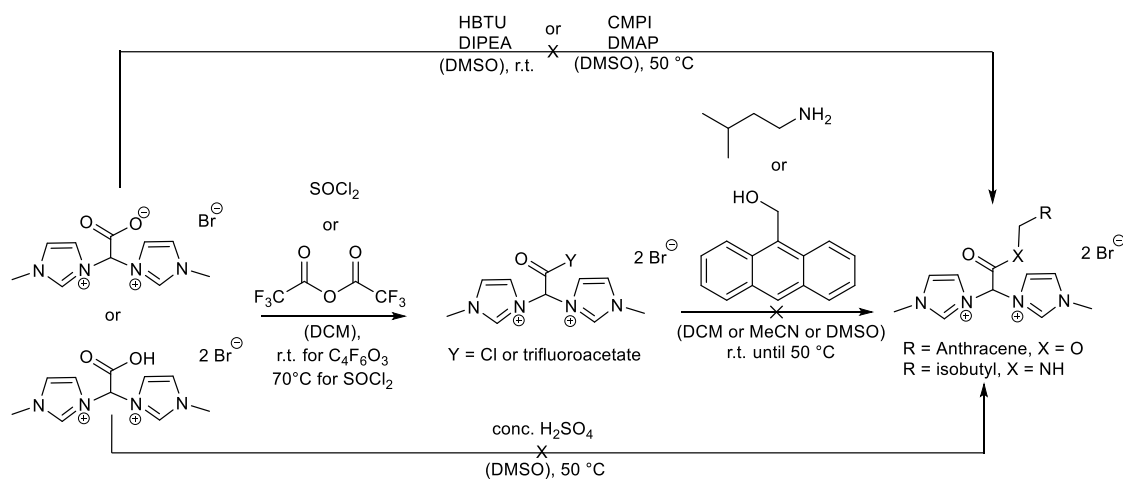

### Au(I) complex

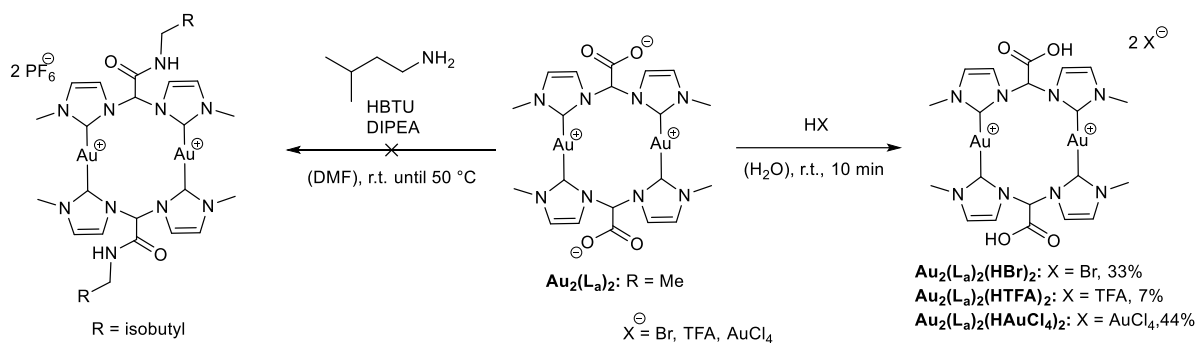

SI-Scheme 1: Reactivity studies of bisimidazolium salt  $\text{L}_a\text{-H}_2\text{-Br}$  or the gold(I) complex  $\text{Au}_2(\text{L}_a)_2$  towards protonation, esterification or amidation reactions. HBTU = 3-[Bis(dimethyl-amino)methyliumyl]-3H-benzotriazol-1-oxide-hexafluorophosphate, DIPEA = N-Ethyl-N-(propan-2-yl)propan-2-amine, CMPI = 2-Chlor-1-methylpyridiniumiodide, DMAP = 4-Di-methylaminopyridine.

## 7. FT-IR spectra

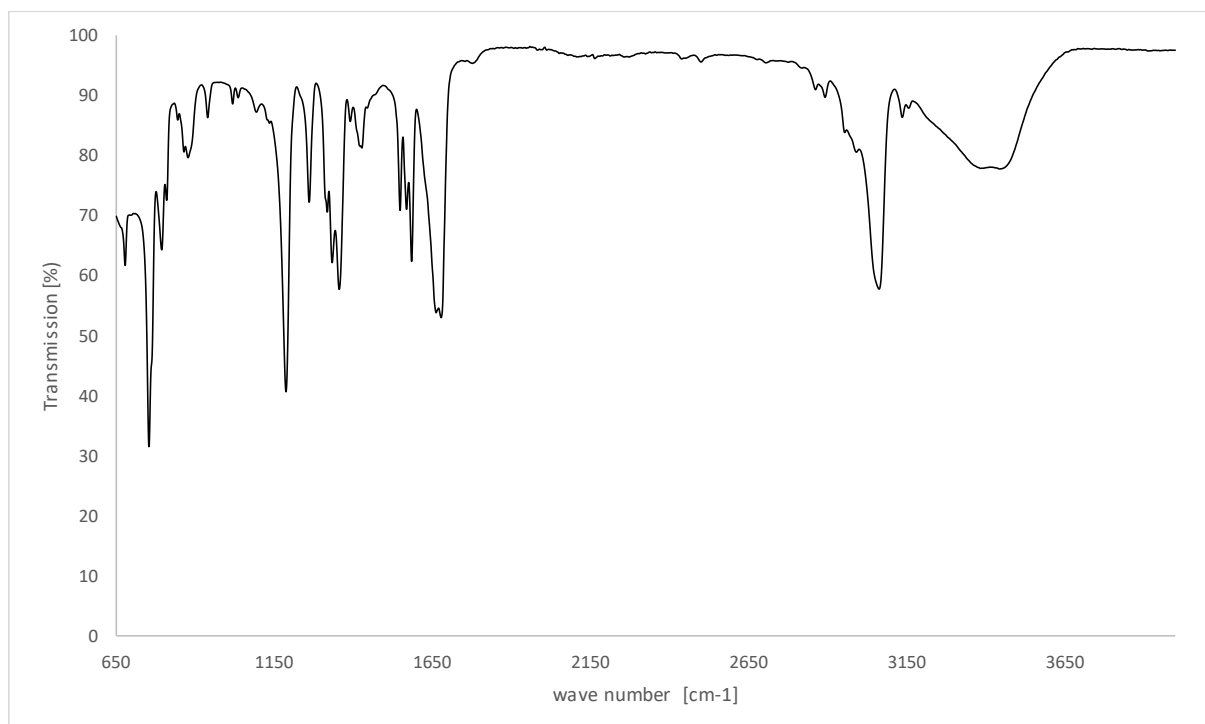

SI-Figure 27: FT-IR spectrum of  $L_a-H_2-Br$ .

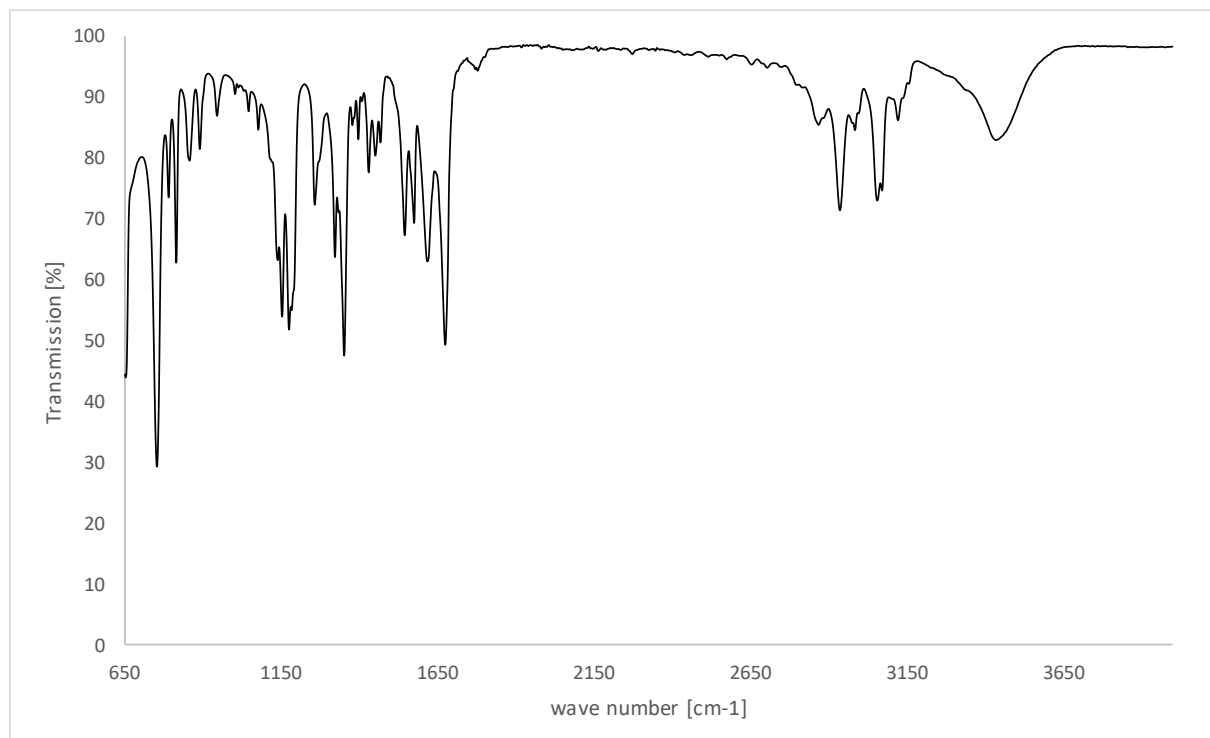

SI-Figure 28: FT-IR spectrum of  $L_b-H_2-Br$ .

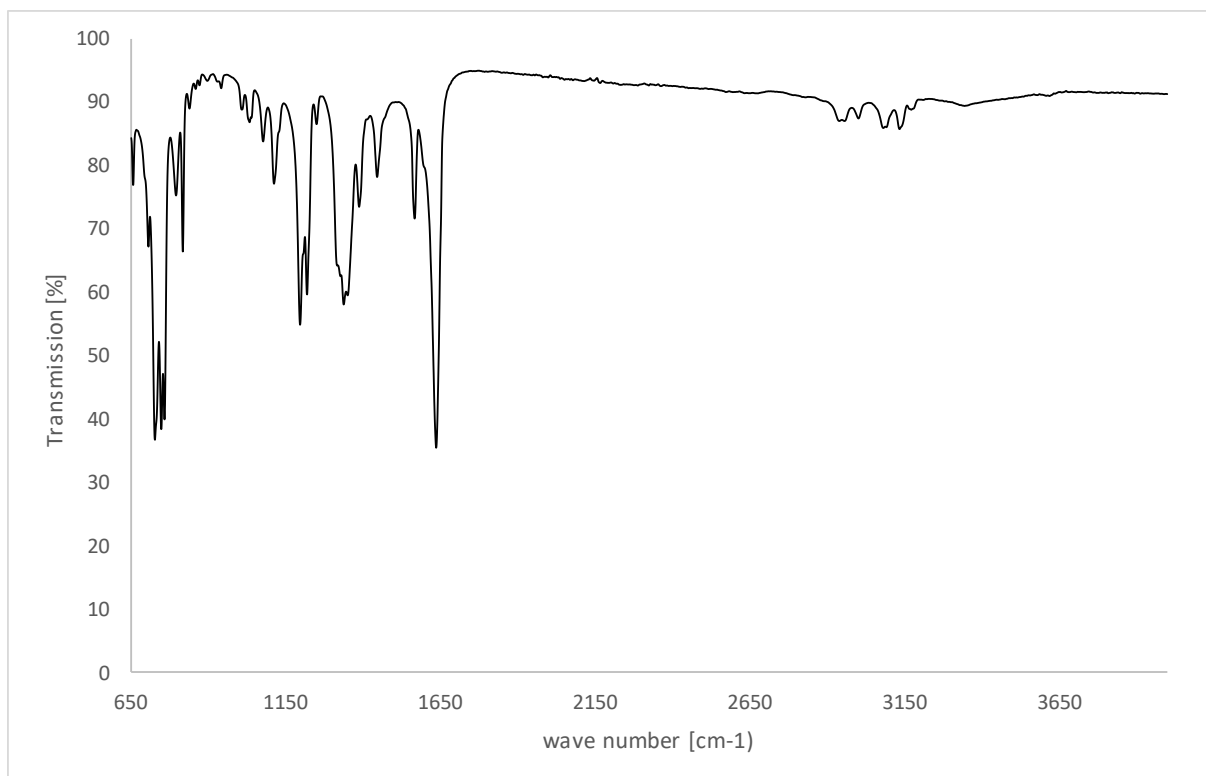

SI-Figure 29: FT-IR spectrum of  $\text{Ag}_2(\text{L}_a)_2$ .

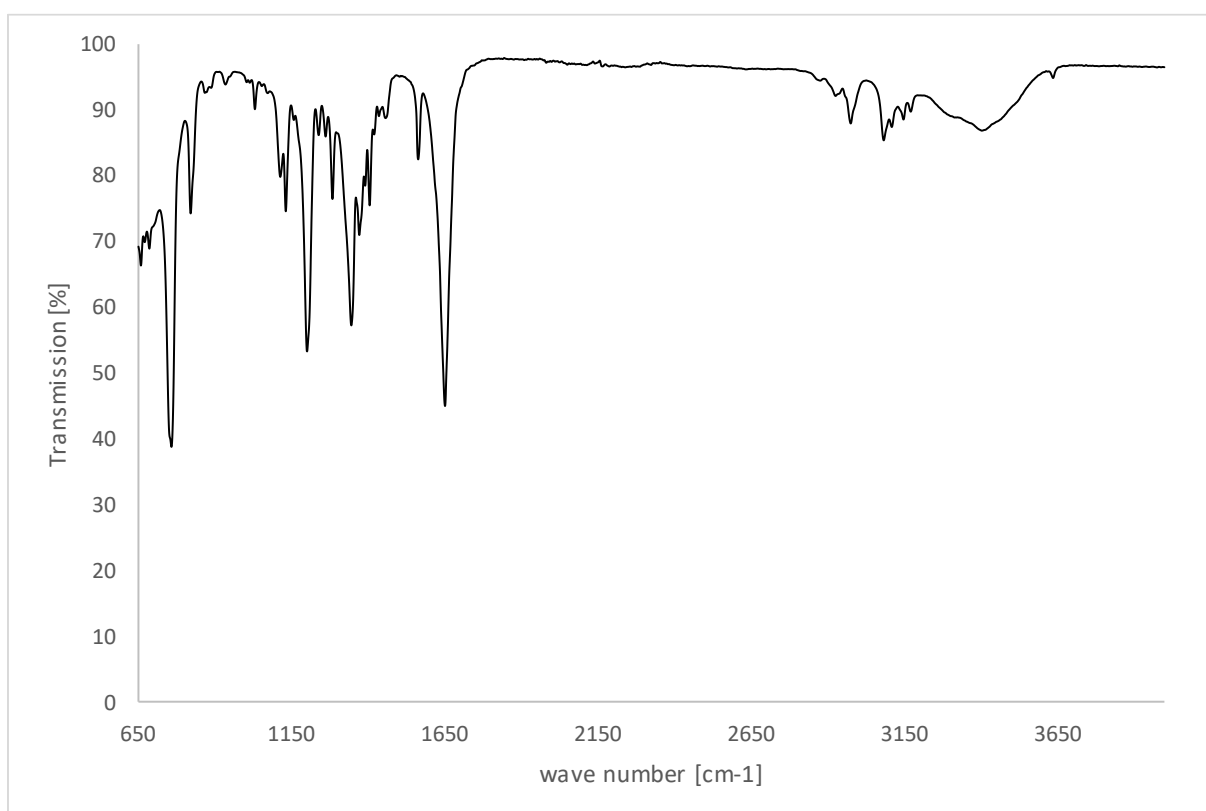

SI-Figure 30: FT-IR spectrum of  $\text{Ag}_2(\text{L}_b)_2$ .

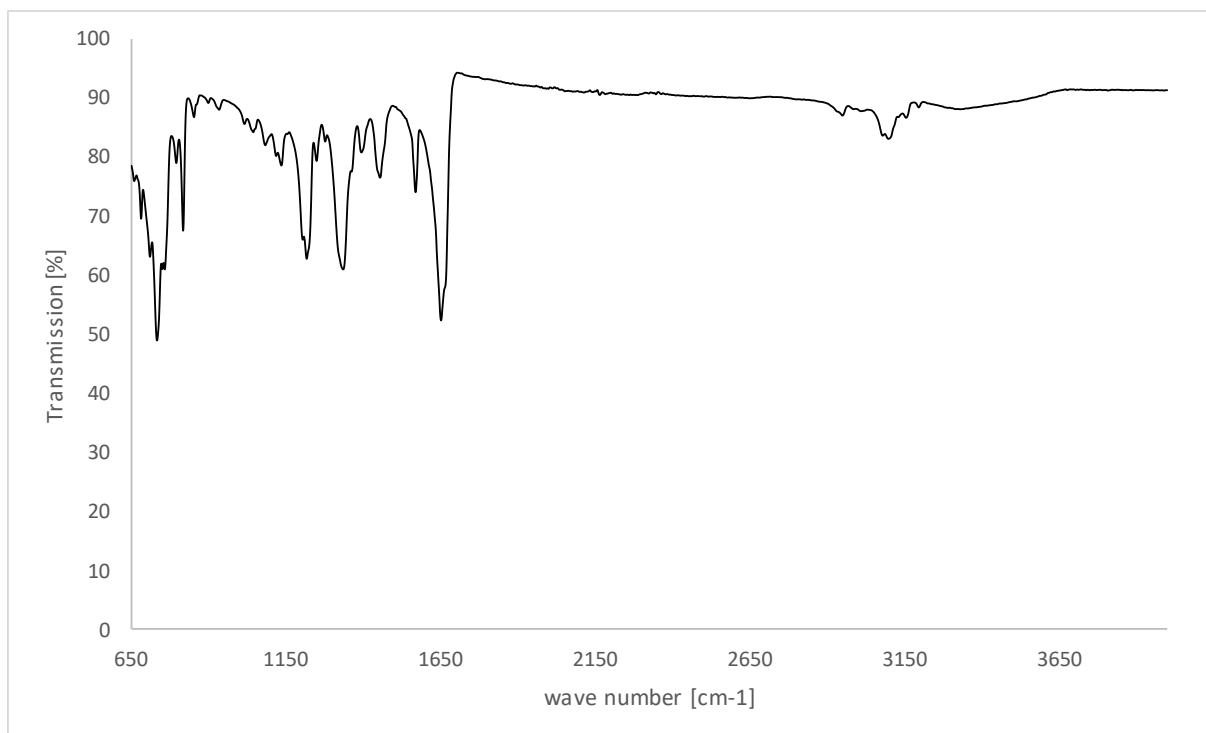

SI-Figure 31: FT-IR spectrum of  $\text{Au}_2(\text{L}_a)_2$ .

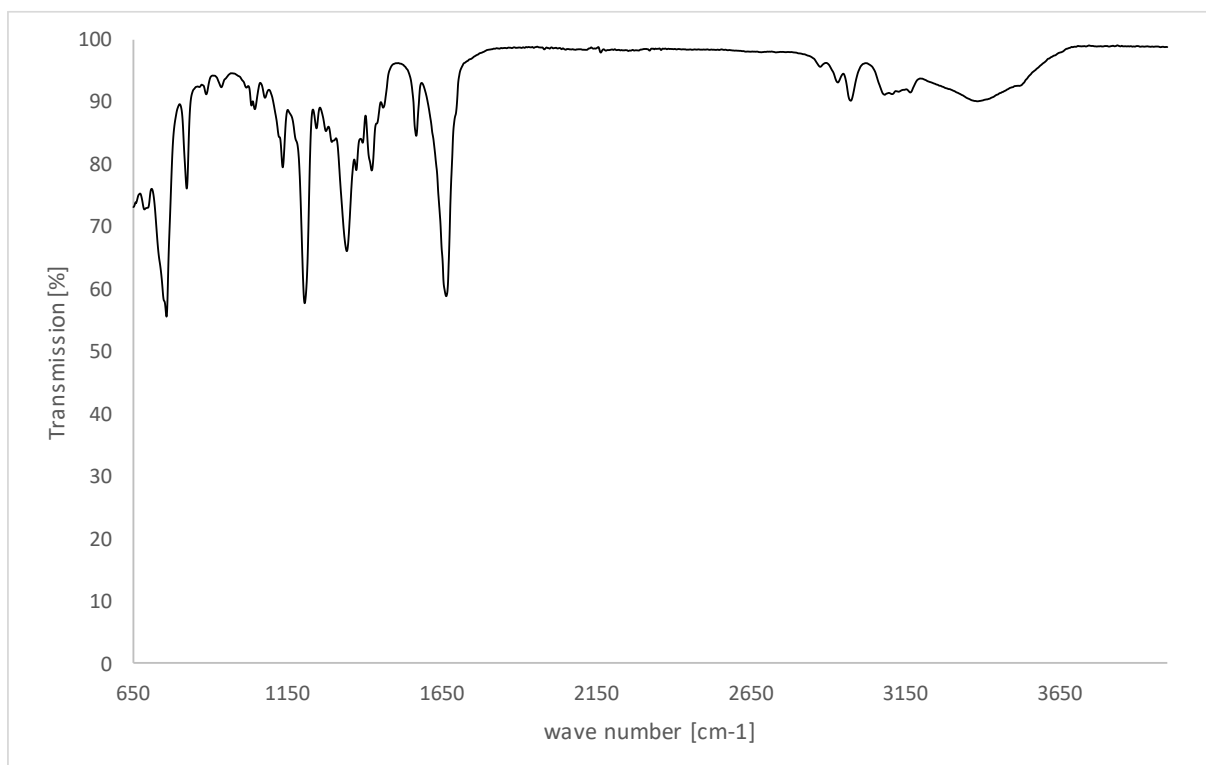

SI-Figure 32: FT-IR spectrum of  $\text{Au}_2(\text{L}_b)_2$ .

## 8. SC-XRD Data

Table 1: Crystallographic details of  $L_a\text{-H}_2\text{-PF}_6$ ,  $Ag_2(L_a)_2$ ,  $Ag_2(L_b)_2$  and  $Au_2(L_a)_2$ .

|                                                    | $L_a\text{-H}_2\text{-PF}_6$<br>(CCDC 1942899)                        | $Ag_2(L_a)_2$<br>(CCDC 1942902)                                         | $Ag_2(L_b)_2$<br>(CCDC 1942901)                                       | $Au_2(L_a)_2$<br>(CCDC 1942900)                                       |
|----------------------------------------------------|-----------------------------------------------------------------------|-------------------------------------------------------------------------|-----------------------------------------------------------------------|-----------------------------------------------------------------------|
| formula                                            | $C_{10}H_{19}F_6N_4O_5P$                                              | $C_{20}H_{22}Ag_2N_8O_4$                                                | $C_{28}H_{38}Ag_2N_8O_4$                                              | $C_{20}H_{22}Au_2N_8O_4$                                              |
| formula weight                                     | 420.26                                                                | 654.18                                                                  | 766.40                                                                | 832.38                                                                |
| color/habit                                        | Clear pale<br>yellow fragment                                         | Clear colorless<br>fragment                                             | Clear colorless<br>fragment                                           | Clear colorless<br>fragment                                           |
| crystal dimensions<br>[mm <sup>3</sup> ]           | 0.08 x 0.081 x<br>0.12                                                | 0.082 x 0.133 x<br>0.146                                                | 0.078 x 0.149 x<br>0.361                                              | 0.041 x 0.138 x<br>0.167                                              |
| crystal system                                     | monoclinic                                                            | triclinic                                                               | triclinic                                                             | monoclinic                                                            |
| space group                                        | $P 2_1/n$                                                             | $P \bar{1}$                                                             | $P \bar{1}$                                                           | $C 2/m$                                                               |
| a [Å]                                              | 11.4241(3)                                                            | 11.3434(5)                                                              | 8.2043(6)                                                             | 15.6805(11)                                                           |
| b [Å]                                              | 6.2939(2)                                                             | 12.6516(5)                                                              | 11.6334(7)                                                            | 21.4574(13)                                                           |
| c [Å]                                              | 23.5348(7)                                                            | 12.7157(6)                                                              | 12.2004(8)                                                            | 12.2321(8)                                                            |
| $\alpha$ [deg]                                     | 90                                                                    | 107.761(2)                                                              | 100.631(3)                                                            | 90                                                                    |
| $\beta$ [deg]                                      | 94.120(0)                                                             | 99.703(2)                                                               | 90.414(3)                                                             | 126.911(3)                                                            |
| $\gamma$ [deg]                                     | 90                                                                    | 113.659(2)                                                              | 91.170(3)                                                             | 90                                                                    |
| V [Å <sup>3</sup> ]                                | 1687.83(9)                                                            | 1500.65(12)                                                             | 1144.16(13)                                                           | 3290.7(4)                                                             |
| Z                                                  | 4                                                                     | 2                                                                       | 2                                                                     | 8                                                                     |
| T [K]                                              | 123(2)                                                                | 100(2)                                                                  | 100(2)                                                                | 123(2)                                                                |
| $D_{\text{calcd}}$ [g/cm <sup>-3</sup> ]           | 1.654                                                                 | 1.448                                                                   | 1.397                                                                 | 1.991                                                                 |
| $\mu$ [mm <sup>-1</sup> ]                          | 0.258                                                                 | 1.339                                                                   | 0.909                                                                 | 8.970                                                                 |
| F(000)                                             | 864                                                                   | 648                                                                     | 492                                                                   | 1872                                                                  |
| $\theta$ range [deg]                               | 1.93 to 25.35                                                         | 2.24 to 27.45                                                           | 2.22 to 25.02                                                         | 1.88 to 25.35                                                         |
| index range (h, k, l)                              | $-13 \leq h \leq +13$<br>$-7 \leq k \leq +7$<br>$-28 \leq l \leq +28$ | $-14 \leq h \leq +14$<br>$-16 \leq k \leq +16$<br>$-16 \leq l \leq +16$ | $-9 \leq h \leq +9$<br>$-13 \leq k \leq +13$<br>$-14 \leq l \leq +14$ | $-12 \leq h \leq +18$<br>$0 \leq k \leq +25$<br>$-14 \leq l \leq +14$ |
| Reflections collected                              | 31974                                                                 | 107428                                                                  | 19315                                                                 | 2859                                                                  |
| no. of indep reflns/ $R_{\text{int}}$              | 3103/0.0518                                                           | 6857/0.0554                                                             | 4051/0.0473                                                           | 2589/0                                                                |
| No. of obsd reflns<br>( $I > 2\sigma(I)$ )         | 2521                                                                  | 6017                                                                    | 3702                                                                  | 2090                                                                  |
| no. of data/<br>restraints/params                  | 3103/0/261                                                            | 6857/0/311                                                              | 4051/78/282                                                           | 2859/87/239                                                           |
| R1/wR2 ( $I > 2\sigma(I)$ )                        | 0.0330/0.0682                                                         | 0.0226/0.0459                                                           | 0.0224/0.0589                                                         | 0.0294/0.0572                                                         |
| R1/wR2 ( <i>all data</i> )                         | 0.0470/0.0737                                                         | 0.0293/0.0477                                                           | 0.0289/0.0634                                                         | 0.0463/0.0590                                                         |
| GOF (on F <sup>2</sup> )                           | 1.039                                                                 | 1.054                                                                   | 1.042                                                                 | 0.832                                                                 |
| Largest diff peak and<br>hole [e Å <sup>-3</sup> ] | 0.286 and -0.312                                                      | 0.431 and -0.555                                                        | 0.656 and -0.680                                                      | 1.188 and -1.253                                                      |

## 9. References

1. R. Puerta-Oteo, M. Hölscher, M. V. Jiménez, W. Leitner, V. Passarelli, J. J. Pérez-Torrente, *Organometallics*, 2018, **37**, 684-696.
2. Y. Li, B. Dominelli, R. M. Reich, B. Liu, F. E. Kühn, *Catal. Commun.*, 2019, **124**, 118-122.
3. J. Rieb, B. Dominelli, D. Mayer, C. Jandl, J. Drechsel, W. Heydenreuter, S. A. Sieber, F. E. Kühn, *Dalton Trans.*, 2017, **46**, 2722-2735.
4. J. Cure, R. Poteau, I. C. Gerber, H. Gornitzka, C. Hemmert, *Organometallics*, 2012, **31**, 619-626.
5. *APEX suite of crystallographic software*, APEX 2, Version 2014.9-0 and APEX 3, Version 2015-5.2, Bruker AXS Inc., Madison, Wisconsin, USA, 2014/2015.
6. *SAINT*, Versions 8.32B, 8.34A and 8.38A, Bruker AXS Inc., Madison, Wisconsin, USA, 2012/2014/2017.
7. *SADABS*, Versions 2012/1, 2014/5 and 2016/2 and *TWINABS*, Version 2012/1, Bruker AXS Inc., Madison, Wisconsin, USA, 2012/2014/2016.
8. G. M. Sheldrick, *Acta Crystallogr. Sect. A*, 2015, **71**, 3–8.
9. G. M. Sheldrick, *Acta Crystallogr. Sect. C*, 2015, **71**, 3–8.
10. C. B. Hübschle, G. M. Sheldrick, B. Dittrich, *J. Appl. Cryst.*, 2011, **44**, 1281–1284
11. *International Tables for Crystallography, Vol. C* (Ed.: A. J. Wilson), Kluwer Academic Publishers, Dordrecht, The Netherlands, 1992, Tables 6.1.1.4 (pp. 500–502), 4.2.6.8 (pp. 219–222), and 4.2.4.2 (pp. 193–199).
12. A.L. Spek, *Acta Crystallogr. Sect. C*, 2015, **71**, 9–18.
13. A. L. Spek, *Acta Crystallogr. Sect. D*, 2009, **65**, 148–155.
14. C. F. Macrae, I. J. Bruno, J. A. Chisholm, P. R. Edgington, P. McCabe, E. Pidcock, L. Rodriguez-Monge, R. Taylor, J. van de Streek, P. A. Wood, *J. Appl. Cryst.*, 2008, **41**, 466–470.
